## 21 Introduction

22 Discriminating and tracking a moving visual object against a cluttered and moving visual background  
23 represents a complex task that nevertheless is common across taxa. Flies have shown a stunning  
24 ability to actively orient toward and fixate foreground stimuli whose detection relies on very few  
25 parameters and is remarkably robust to perturbation (Egelhaaf, 1985; Reichardt et al., 1983; Theobald  
26 et al., 2008). Object orientation behavior becomes extremely challenging during locomotion, when  
27 the visual panorama moves across the retina generating complex patterns of optic flow that can move  
28 with or against the direction of the pursued object. *Drosophila* has been a productive model for  
29 understanding how patterns of wide-field optic flow are decoded by an array of small-field local  
30 motion detectors (Borst, 2014; Mauss and Borst, 2020) and how local motion direction is computed  
31 (Borst et al., 2020b; Groschner et al., 2022; Gruntman et al., 2019). Local motion detectors segregate  
32 into parallel ON and OFF luminance selective cells T4 and T5, respectively (Joesch et al., 2010;  
33 Strother et al., 2017). These two types of columnar neurons have four subtypes, each tuned to a  
34 singular cardinal direction, which each innervate one of four direction-selective layers of the lobula  
35 plate, the fourth neuropil of the optic lobe (Fisher et al., 2015; Maisak et al., 2013). Second-order  
36 interneurons of the lobula plate pool inputs from T4/T5 cells to assemble complex spatial filters for  
37 patterns of optic flow, and then project to pre-motor descending pathways to coordinate syn-  
38 directional head and wing steering movements that stabilize gaze against perturbations during  
39 locomotion (Busch et al., 2018; Haikala et al., 2013; Heisenberg et al., 1978). However, wide-field  
40 optic flow and its corollaries (e.g., looming stimuli) are not the only visual features that flies need to  
41 extract from the visual world (Borst et al., 2020a; Cheong et al., 2020).

42 Identifying foreground objects from a cluttered background requires visual computations that  
43 are unlikely to be carried out by the same direction selective system (Aptekar and Frye, 2013;  
44 Reichardt et al., 1983). In tethered walking flies, synaptic suppression of T4/T5 cells has been shown  
45 to leave transient orientation response toward a flickering bar essentially unaffected, while  
46 dramatically reducing the response to a moving bar (Bahl et al., 2013). In a follow-up experiment,  
47 flying flies were presented with a textured vertical bar revolving around a circular arena. Flies  
48 responded with a distinct initial steering response oriented counter directional to the moving bar,  
49 followed by a secondary response in the same direction of bar movement (Keleş et al., 2018).  
50 Silencing T4/T5 under these conditions reduced the secondary syn-directional steering response, but  
51 left the initial counter-directional orientation phase intact (Keleş et al., 2018). These studies would  
52 suggest the existence of a motion-independent sub-system that mediates object orientation, likely  
53 detecting spatial contrast information, operating in parallel to the T4/T5 motion detection pathway

54 (Bahl et al., 2015, 2013). One study proposed that a model based solely on T4/T5-like directional  
55 motion detectors and small-field integrators such as so-called ‘figure detecting’ neurons (Liang et al.,  
56 2012) can account for the smooth steering movements that drive bar fixation behavior by tethered  
57 flies, even under the challenge of opposing background motion (Fenk et al., 2014).

58 By contrast to rigidly tethered flies, animals tethered to a frictionless magnetic pivot and free  
59 to steer in the yaw plane execute rapid body saccades to track an object in the form of a rotating  
60 vertical edge or bar. By contrast, they execute smooth steering movements to stabilize a revolving  
61 wide-field panorama, interspersed with occasional saccades (Mongeau and Frye, 2017). The  
62 dynamics of bar tracking saccades are distinct from those triggered by a wide-field motion (Mongeau  
63 and Frye, 2017). Therefore, the evidence for or against a T4/T5-independent mechanism for object  
64 tracking might be resolved by considering the differential control of smooth optomotor steering and  
65 saccadic reorientation.

66 Here, we support previous lines of evidence that T4/T5 coordinate smooth optomotor  
67 responses for wide-field gaze stabilization, but that a parallel neural pathway supplies the control of  
68 object tracking saccades. T3 neurons (Keleş et al., 2020; Tanaka and Clark, 2020) arborize within  
69 single columns of the medulla and send axons into layers 2 and 3 of the third neuropil of the optic  
70 lobe, the lobula (Fischbach and Dittrich, 1989; Takemura et al., 2013). Using calcium imaging, we  
71 demonstrate that T3 neurons respond vigorously to the background-matched motion-defined bars that  
72 robustly elicit bar tracking saccades (Mongeau et al., 2019; Mongeau and Frye, 2017). In rigidly  
73 tethered flies, hyperpolarizing T3 by genetically expressing an inward rectifying potassium channel  
74 (Kir2.1) reduces the initial counter-directional orientation response typically deployed for tracking  
75 motion-defined bars. In magnetically tethered flies, hyperpolarizing T3 neurons reduced the number  
76 of bar tracking saccades, whereas optogenetic activation by CsChrimson increased them. Finally, we  
77 posit a role of T3 in triggering bar tracking saccades through an integrate-and-fire model  
78 physiologically inspired by the calcium dynamics of T3 neurons and a control model of saccadic bar  
79 tracking (Mongeau and Frye, 2017).

## 80 **Results**

### 81 **T3 neurons are well-tuned to encode motion-defined bars**

82 The lobula is mainly innervated by a class of visual projection neurons (VPNs), the lobula  
83 columnar (LC) cells, each type of which project together to the central brain forming bundles of type-  
84 specific terminals called optic glomeruli (Aptekar et al., 2015; Panser et al., 2016; Wu et al., 2016).  
85 In previous work (Keleş et al., 2020), our lab used an intersectional strategy to generate specific split-

86 Gal4 driver lines for two T-shaped neuron types, T3 and T2a, arborising in the medulla and  
87 terminating in layer 2 and 3 of the lobula (Fischbach and Dittrich, 1989; Takemura et al., 2013). The  
88 cell bodies of T3 and T2a are caudally located in the space between the medulla and lobula plate  
89 neuropiles (Fischbach and Dittrich, 1989).

90 To characterize responses to vertical bars by T3 neurons, we recorded calcium signals under  
91 *in vivo* two-photon excitation imaging with an LED visual stimulus (Reiser and Dickinson, 2008)  
92 (**Figure 1A**). We imaged from presynaptic terminals in the lobula of flies expressing GCaMP6f in  
93 T3 (**Figure 1B**). Flies were presented with bars moving across the right visual field, ipsilateral to the  
94 recording site, of varying direction and contrast polarity (**Figure 1C**). T3 showed increase in calcium  
95 activity within individual presynaptic terminals, and the ensemble of T3 dendrites innervating layer  
96 9 of the medulla exhibited a robust retinotopic wave of activation as the bar swept across the retina  
97 (**Figure 1C, Video 1**). Broadly consistent with prior results (Keleş et al., 2020), T3 neurons were  
98 strongly activated by front-to-back and back-to-front motion of either ON (brighter than background)  
99 or OFF (darker than background) bars (**Figure 1D**), with a slight preference for OFF transitions.

100 We next determined the receptive field (RF) size of a single T3 neuron (**Figure 1E**) (Städle  
101 et al., 2020). We divided the right hemifield of the visual display into 10 azimuthal and 8 elevation  
102 rectangular sampling bins and presented flies with a 2.25° dark bar moving within each bin in  
103 orthogonal directions (see Methods). Responses to vertical and horizontal bar displacements were  
104 then multiplied to obtain the outer product (**Figure 1F**). To average RF size across flies, we selected  
105 the peak values of each bin and normalized them to the maximum value of the outer product. Finally,  
106 we spatially centered and averaged the RFs (**Figure 1G**). Average T3 RF size was mainly confined  
107 to the central 9° bin with almost no activity outside of it, consistent with a previous estimation  
108 (Tanaka and Clark, 2020). We tested directional selectivity by comparing responses to four cardinal  
109 directions. We found that T3 neurons were almost identically sensitive to leftward and rightward  
110 moving bars, as well as to upward and downward movements, although with a higher variability to  
111 the latter (**Figure 1H**).

112 Next, we explored how T3 respond to patterned “motion-defined” bars that robustly evoke  
113 saccades (Mongeau et al., 2019; Mongeau and Frye, 2017). A motion-defined bar is composed of the  
114 same random ON/OFF pattern as the stationary background, and therefore only detectable while in  
115 motion, by contrast to a classical luminance defined bar, which is brighter or darker than the  
116 surroundings and thus detectable even when stationary. Note that T4/T5 respond more strongly to a  
117 solid luminance-defined bar by comparison to a motion-defined bar (Keleş et al., 2018) due to  
118 sensitivity for longer spatial wavelength stimuli (optimum  $\geq 15^\circ$  wide solid bar) (Agrochao et al.,

119 2020; Groschner et al., 2022; Gruntman et al., 2019; Shinomiya et al., 2019). Due to T3 rapid response  
 120 kinetics to flicker (Keleş et al., 2020), we reasoned that these cells should be robustly excited by the  
 121 motion-defined bars that drive saccades. We presented motion-defined bars moving front-to-back and  
 122 back-to-front at three speeds. As expected, T3 neurons responded strongly to these stimuli by  
 123 comparison to solid ON and OFF bars (Figure 1I). As bar speed increased the responses decreased  
 124 monotonically (Figure 1I), both for motion-defined and for solid OFF and ON bars (Supplementary  
 125 Figure 1A).  
 126 We coarsely assessed wide-field responses by T3 by presenting gratings of two different  
 127 spatial frequencies moving at different velocities in two directions. As expected, wide-field responses  
 128 showed phasic responses to individual cycles of the pattern, without selectivity for motion direction  
 129 (Supplementary Figure 1B). Temporal frequency is the ratio of velocity to spatial wavelength, and  
 130 thus if T3 behaves like T4/T5 then we would expect to observe responses tuned to the temporal

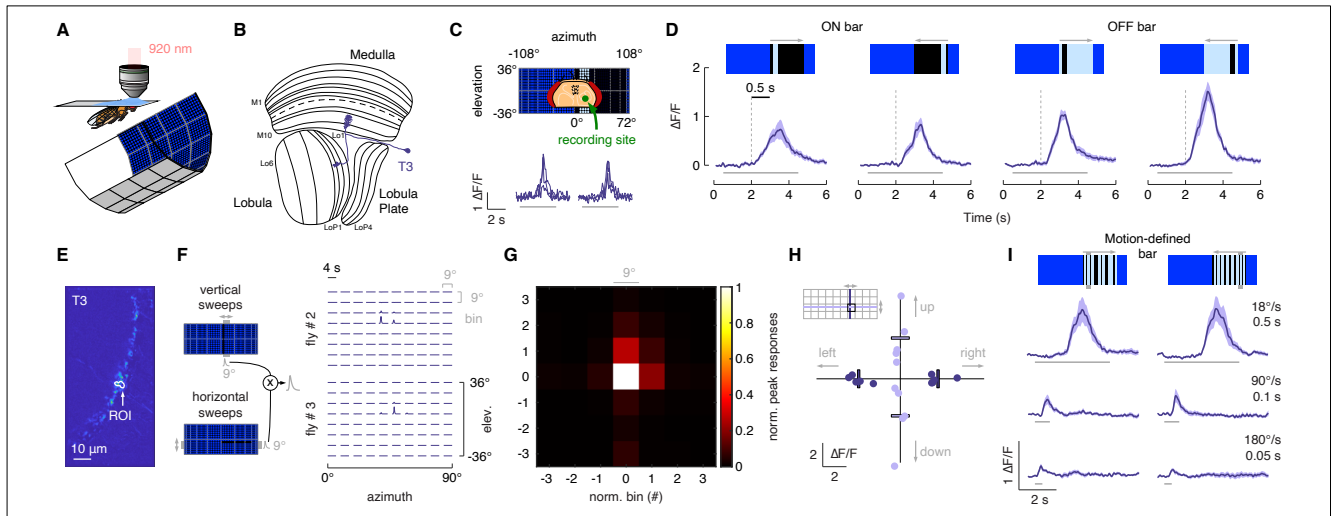

**Figure 1.** T3s are omnidirectional neurons with small receptive fields and broad temporal sensitivity. (A) Head-fixed fly for two-photon calcium imaging while presented with visual stimuli from a surrounding LED display. (B) Fly optic lobe neuropils (medulla, lobula and lobula plate) with a T3 neuron highlighted in magenta. (C) Top: schematic representation of the fly head and the recording site framed in the center of the LED display. Bottom: calcium imaging responses to a ON solid moving bar at 18° s<sup>-1</sup> (left: front-to-back, right: back-to-front) of a T3 neuron from a representative fly (3 repetitions). (D) Average responses (mean ± s.e.m.) to moving ON and OFF solid bars (9° x 72°, width x height) at 18° s<sup>-1</sup> in two different directions (front-to-back and back-to-front). Visual stimuli are depicted at the top. Dashed vertical gray lines indicate the coarse onset of the responses. Light gray horizontal bars at the bottom indicate stimulus presentation (n = 11 flies, 3 repetitions per fly). (E) ROI drawn around the presynaptic terminal in the lobula of a T3 neuron expressing GCaMP6f. Image representing the mean activity from the two-photon imaging experiment in a representative fly. (F) Left: representation of the procedure used to compute the RF of T3. Gray shaded region behind the LED display represents a bin (9° x 72°, width x height) within which a single pixel dark bar (2.25° width) is swept in two different directions. The cross product is then obtained by multiplying the calcium responses to vertical and horizontal sweeps. Right: matrix of the multiplied traces in the 10 x 8 bins (horizontal x vertical) in two representative flies. The RF is probed within a window of 90° x 72° (horizontal x vertical). (G) Mean of the normalized peak responses of T3 neurons by spatial location (n = 5 flies). Bin = 0 represents the center of the RF. (H) Directional calcium peak responses to a 2.25° dark bar moving (18° s<sup>-1</sup>) in the four cardinal directions of individual flies. Bars indicate the mean. (I) Average responses (mean ± s.e.m.) to motion-defined bars (9° x 72°, width x height) moving in two different directions (front-to-back and back-to-front) at three different speeds (times indicate how long it takes from the leading and trailing edges). Light gray horizontal bars at the bottom indicate stimulus presentation (n = 11 flies, 3 repetitions per fly).

131 frequency, not to the stimulus velocity. Oddly, the amplitude of responses to the  $\lambda=18^\circ$  pattern  
132 moving at 2 Hz ( $36^\circ \text{ s}^{-1}$ ) were very similar to the responses to the  $\lambda=36^\circ$  pattern moving at 1 Hz ( $36^\circ$   
133  $\text{ s}^{-1}$ ), indicating that response amplitude was tuned to stimulus velocity, not temporal frequency  
134 (Supplementary Figure 1c). Furthermore, the two spatial patterns presented at  $90^\circ \text{ s}^{-1}$  (5 Hz and 2.5  
135 Hz temporal frequency) produced identical amplitude responses (**Supplementary Figure 1C**).

136 As we did for T3, we also characterized the responses to bar stimuli by T2a neurons, which  
137 innervate layer 1, 2 and 9 of the medulla (**Supplementary Figure 2A**). Similar to T3, T2a presented  
138 a small RF and an omnidirectional sensitivity (**Supplementary Figure 2B-D**). T2a showed strong  
139 responses to luminance-defined bars (with a preference for ON transitions) moving at a low speed  
140 ( $18^\circ \text{ s}^{-1}$ ), but not at behaviorally relevant higher speeds (**Supplementary Figure 2E**). Moreover, they  
141 showed weak-to-no responses to motion-defined bars (**Supplementary Figure 2F**) and wide-field  
142 gratings (**Supplementary Figure 2G**). These results emphasize the distinct visual receptive field  
143 properties among different classes of columnar T-neurons, and distinguish potential behavioral  
144 importance of T3 neurons to the bar tracking behaviors of flies. We therefore focus our behavioral  
145 analysis on T3 neurons.

#### 146 **Hyperpolarizing T3 reduces counter-directional object orientation by rigidly tethered flies**

147 Rigidly tethered flies respond to a bar revolving around a cylindrical visual display (**Figure**  
148 **2A**) with a compound counter-directional orientation response while the bar is in the visual periphery,  
149 switching to syn-directional tracking response as the bar approaches and crosses the visual midline  
150 (Reiser and Dickinson, 2010). **Figure 2A** shows, in schematic form, the direction that flies steer in  
151 response to a revolving bar. As the bar moves from the rear into the periphery, the fly initially steers  
152 toward the bar's position, opposite its direction of motion (**Figure 2A**, lower). As the bar moves  
153 towards visual midline, the steering effort switches to track the direction of bar motion. The sum of  
154 the initial counter-directional and following syn-directional turns results in zero net steering effort  
155 once the bar is on visual midline - the fly is oriented directly at the bar. A defect in the counter-  
156 directional orientation phase would be expected to reduce the magnitude of the red trace, whereas a  
157 defect in syn-directional tracking would reduce the magnitude of the blue trace (**Figure 2A**, lower).

158 Flies expressing outward cation channel Kir2.1 (Baines et al., 2001) in T4/T5 neurons showed  
159 weakened syn-directional tracking responses, but unaltered counter-directional orientation responses  
160 (Keleş et al., 2018) (**Figure 2B**), confirming that T4/T5 neurons are required for directional tracking,  
161 but not for positional orientation. We repeated this experiment after silencing T3 neurons. Compared  
162 to the responses of enhancerless split-Gal4 crossed with UAS-Kir2.1, the counter-directional  
163 orientation responses of T3 silenced flies were significantly reduced, whereas T4/T5 silenced flies



164 were unaffected (**Figure 2B**). Flies with hyperpolarized T3 neurons responded to the revolving bar  
 165 by steering ( $\Delta WBA$ ) always in the direction of motion. Thus, as the bar crossed visual midline, these  
 166 animals showed a seemingly “anticipatory” response ( $\Delta WBA > 0$  at visual midline). By contrast,  
 167 controls and T4/T5 silenced flies showed an initial counter-directional orientation response, followed  
 168 by a weakened syn-directional phase superposing so that steering is balanced ( $\Delta WBA = 0$ ) as the bar  
 169 crossed midline (**Figure 2B**). Quantification of the steering effort as the bar crossed midline indicates  
 170 significant influence of hyperpolarizing T3, but not T4/T5 or the genetic control (**Figure 2B**, right).

171 To better visualize the finding that counter-directional orientation responses were strongly  
 172 compromised by hyperpolarizing T3, we integrated the  $\Delta WBA$  over time as a measure of optomotor  
 173 wind-up. We then color coded each trace and zoomed in on trajectories passing near the visual  
 174 midline. Reflecting and pooling responses to the two directions of bar revolution produced a heat  
 175 map that reveals reduced orientation responses (red) for T3 silenced flies by comparison with controls  
 176 and T4/T5 silenced flies (**Figure 2C**).

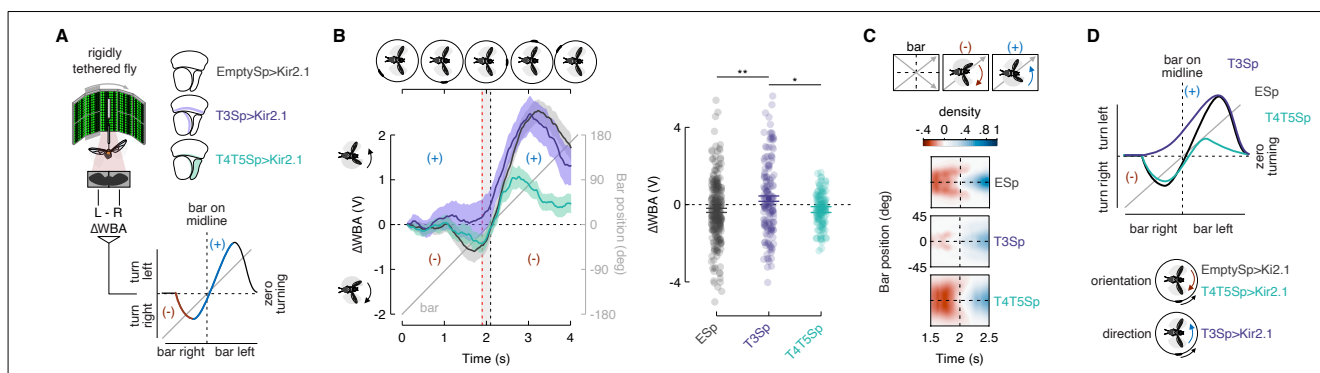

**Figure 2.** Constitutive silencing of T3 compromises the orientation response. (A) Left: cartoon of the rigid-tether setup in which a fly is glued to a tungsten pin and placed within a surrounding LED display presenting a random pattern of bright and dark stripes. An infrared diode above the fly casts a shadow on an optical sensor that records the difference between the left and right wing beat amplitudes ( $\Delta WBA$ ). Middle: schematic representation of the optic lobe regions where Kir2.1 channels were expressed in the three genotypes tested (data referred to T4/T5Sp>Kir2.1 flies are reproduced from Keleş et al., 2018). Bottom: schematic diagram of the experiment. A bar revolves around the fly (gray). Initially, steering is in the direction opposite bar motion plotted in red (-), followed by steering in the same direction as the bar plotted in blue (+). Depending on the strength of each response, the steering effort may be non-zero when the bar is at zero degrees (midline). (B) Top: schematic of the bar positions over time. Left: population average time series steering responses (mean  $\pm$  s.e.m.) in the three genotypes tested (T4/T5Sp data replotted from Keleş et al., 2018) to a motion-defined bar revolving at 90° s<sup>-1</sup> (responses to CCW rotations were reflected and pooled with CW responses). Gray shaded region (between the vertical red and black dashed lines) represents a 200 ms time window before the bar crosses the fly’s visual midline (n = 44 EmptySp>Kir2.1, n = 26 T3Sp>Kir2.1, n = 22 T4/T5Sp>Kir2.1). Note that T3Sp>Kir2.1 reduces counter-directional steering, whereas T4/T5Sp>Kir2.1 reduces syn-directional steering. Right: dot plot average  $\Delta WBA$  values across the 200 ms time window per trial. Dark dots indicate the mean and the horizontal bars indicate s.e.m. A linear mixed model was used to fit the data and ANOVA with pairwise post-hoc comparisons adjusted using Bonferroni method were used to compare the three genotypes (F(2, 89) = 5.83, p = .004; EmptySp vs T3Sp: p = .005; EmptySp vs T4/T5Sp: p = 1; T3Sp vs T4/T5Sp: p = .03). (C) Heat maps of flies’ steering effort at the population level in the three genotypes as a function of the bar position (data are mirrored along the x-axis in order to get a uniform directional distribution). EmptySp and T4/T5Sp show a strong counter-directional response (red blob) while T3Sp show only a very slight counter-directional response. (D) Schematic summary of experimental results. T4/T5>Kir reduces the syn-directional tracking effort while leaving the counter-directional (-) orientation response intact. T3Sp>Kir2.1 reduces the counter-directional steering effort, leaving the syn-directional response (+) intact, and therefore steers leftward of the bar as it crosses midline.

177 For bar stimuli that evoke significantly stronger syn-directional steering effort, such as a 30°  
178 wide solid dark bar, silencing T3 had no effect, whereas, as shown previously (Keleş et al., 2018),  
179 blocking T4/T5 neurons did (**Supplementary Figure 3A,B**). Confirming the results of **Figure 2**, the  
180 typical “anticipatory” response generated by winding up the optomotor system, which is dependent  
181 on T4/T5 neurons, was intact in T3 silenced flies (**Supplementary Figure 3C,D**). In summary, the  
182 syn-directional optomotor driven response to a moving bar is dependent upon T4/T5 activity, whereas  
183 the counter-directional orientational response is dependent upon T3 activity (**Figure 2D**).

### 184 **T3 hyperpolarization reduces saccadic bar tracking in magnetically tethered flies**

185 In freely flying flies, orientation responses to visual objects trigger rapid body rotations called  
186 saccades for the functional analogy to our own gaze stabilizing rapid eye movements (Land, 1992;  
187 Tammero and Dickinson, 2002; van Breugel and Dickinson, 2012). Behavioral results and theoretical  
188 models suggest that both orientation responses by rigidly tethered flies and saccadic tracking  
189 responses by magnetically tethered flies could be coordinated by non directional (or omnidirectional)  
190 positional feature detectors with sensitivity to the high frequency transients generated by motion-  
191 defined bars, naturalistic stimuli that would not strongly activate directional motion detectors (Keleş  
192 et al., 2018; Mongeau and Frye, 2017; Reichardt and Poggio, 1976). T3 cells indeed show these  
193 physiological properties (**Figure 1**), and are required for intact counter-directional orientation  
194 steering effort (**Figure 2**). We therefore tested the functional role of T3 neurons for saccadic bar  
195 tracking by using magnetically tethered flies, free to steer in yaw on a frictionless pivot and execute  
196 robust body saccades (**Figure 3A**).

197 Following the approach of prior work (Mongeau and Frye, 2017), we elicited bouts of tracking  
198 saccades by revolving a motion-defined bar against a stationary background (**Figure 3A**, right). In  
199 magnetically tethered flies, saccades are easily identified by characteristic impulses in angular  
200 velocity resulting in stepwise changes in flight heading (**Figure 3A**, right, **Video 2**). We  
201 hyperpolarized T3 and T4/T5 neurons by expressing Kir2.1 channels with split-Gal4 lines (**Video 3**  
202 and **4**). We first measured the cumulative angular distance that flies traveled in response to bar  
203 motion. Each trial was parsed into 5 second bins, normalized for initial heading (0°), and overlaid.  
204 Assuming bilateral symmetry, we reflected the CCW traces so as to have all traces representing  
205 responses to CW bar motion (**Figure 3B**, positive-going cumulative angle). We spatially pooled the  
206 overlaid traces to generate a heat map of the cumulative angular distance traveled by flies in each 5  
207 second epoch. Empty vector controls dispersed within the first second, but T3 silenced flies remained  
208 concentrated at their initial heading, indicating that they were not tracking the motion-defined bar  
209 (**Figure 3B**). T4/T5 silenced flies dispersed similar to controls. We next enumerated body saccades



210 per trial (Mongeau and Frye, 2017). Both T3 and T4/T5 silenced flies performed fewer tracking  
 211 saccades per trial than controls, suggesting dependence of both of these cell types for triggering  
 212 saccades (**Figure 3C**). We measured the angular velocity profile of saccades, which did not differ  
 213 across the three genotypes (**Figure 3D**), and same for saccade duration (**Figure 3E**). However,  
 214 saccade amplitude was slightly reduced in T3 blocked flies and strongly reduced in T4/T5 blocked  
 215 flies (**Figure 3F**). As expected, in response to rotation of the full wide-field panorama, T4/T5 silenced  
 216 flies showed reduced smooth tracking gain (ratio of body rotation to stimulus rotation,

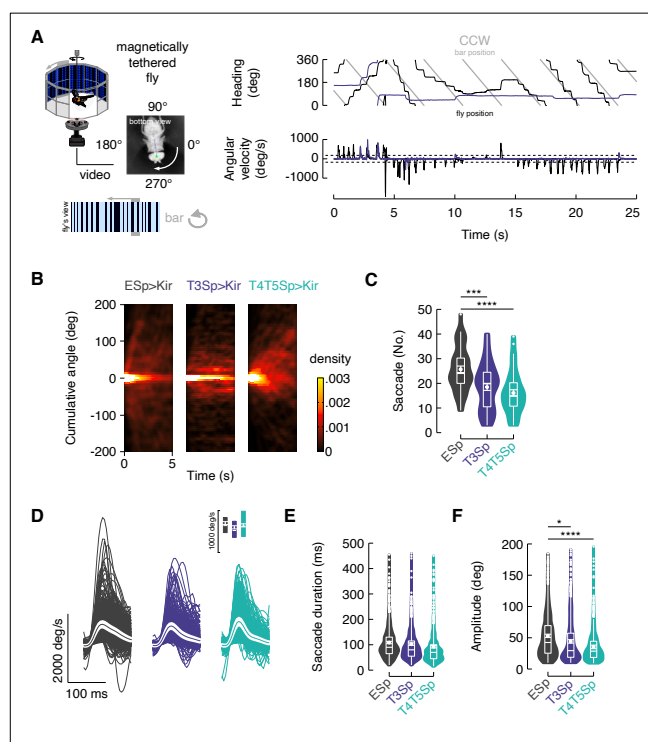

**Figure 3.** Flies with T3 hyperpolarized poorly track a motion-defined bar. **(A)** Top-left: cartoon of the magnetic-tether setup in which a fly is glued to a stainless steel pin and suspended within a magnetic field in turn placed within a surrounding LED display presenting a random pattern of bright and dark stripes. Infrared diodes illuminate the fly from below and a camera captures videos of the fly's behavior from the bottom. Bottom-left: motion-defined bar moving CCW from the fly's perspective. Top-right: wrapped heading traces from two representative flies (dark: EmptySp>Kir2.1; magenta: T3Sp>Kir2.1) responding to a CCW revolving motion-defined bar at  $112.5^\circ \text{ s}^{-1}$  for 25 s. Gray line represents the bar position (in this plot it relates to the EmptySp fly). Bottom-right: filtered angular velocity profiles referring to the two representative flies at the top. Horizontal dashed lines indicate the threshold for detecting saccades. **(B)** Heat maps of the cumulative (i.e., unwrapped) angular distance traveled by flies within bins of 5 s in the three genotypes during the rotation of a motion-defined bar ( $n = 23$  EmptySp>Kir2.1,  $n = 22$  T3Sp>Kir2.1,  $n = 22$  T4/T5>Kir2.1). **(C)** Violin-box plots of number of bar tracking saccades per trial in the three genotypes (pairwise post-hoc comparisons adjusted Bonferroni, EmptySp vs T3Sp:  $p = .0003$ ; EmptySp vs T4/T5Sp:  $p < .0001$ ; T3Sp vs T4/T5Sp:  $p = .55$ ). Big white dots represent the mean, thin horizontal bars indicate s.e.m. and thick horizontal bars indicate the median. Small white dots on the violin tails represent outliers. **(D)** Average angular velocity (mean  $\pm$  s.e.m.) during bar tracking saccades in the three genotypes. Top: peak angular velocity (pairwise post-hoc comparisons adjusted Bonferroni, EmptySp vs T3Sp:  $p = .40$ ; EmptySp vs T4/T5Sp:  $p = 1$ ; T3Sp vs T4/T5Sp:  $p = 1$ ). Thin lines represent single saccades. **(E)** Violin-box plots of saccade duration (pairwise post-hoc comparisons adjusted Bonferroni, EmptySp vs T3Sp:  $p = .37$ ; EmptySp vs T4/T5Sp:  $p = .13$ ; T3Sp vs T4/T5Sp:  $p = 1$ ). Central tendency measures as in C. **(F)** Violin-box plots of saccade amplitude (pairwise post-hoc comparisons adjusted Bonferroni, EmptySp vs T3Sp:  $p = .01$ ; EmptySp vs T4/T5Sp:  $p = .001$ ; T3Sp vs T4/T5Sp:  $p = 1$ ).

217 **Supplementary Figure 4A,B**) due to compromised directional optomotor responses (Bahl et al.,  
218 2013).

### 219 **Inducible T3 depolarization enhances saccadic bar tracking in magnetically tethered flies**

220 Constitutive hyperpolarization of T3 shows that normal excitatory activity in these cells is  
221 required for saccadic bar tracking pursuit in flight (**Figure 3**). We sought to further support this result  
222 with an inducible perturbation. We expressed CsChrimson (Klapoetke et al., 2014) channels in T3  
223 and T4/T5 neurons and stimulated with periods of CsChrimson-activating red light intermittently  
224 OFF and ON with 5 second intervals, while presenting flies with a revolving motion-defined bar  
225 (**Figure 4A**). This approach activates the population of columnar neurons together, rather than in the  
226 spatially localized retinotopic manner they would be normally active. Therefore, we consider this  
227 approach to function as a loss-of-function perturbation, rather than a gain-of-function excitation of  
228 T3, and is of course dynamic rather than static (e.g., Kir2.1). Our aim was to assess how bar tracking  
229 behavior was impacted by either phase of the perturbation: saturating ensemble depolarization, or  
230 recovery. In controls, the light ON did provoke small changes in the flies' heading (**Figure 4B**, top  
231 black). Activation of T3 neurons at high LED intensity tended to reduce or eliminate active bar  
232 tracking, instead provoking seemingly random exploratory saccades (**Figure 4B**, middle magenta).  
233 Ensemble depolarization of T4/T5 evoked seemingly stronger bar tracking (**Figure 4B**, bottom  
234 green). To visualize the population effects of dynamic depolarization, we binned together the  
235 unwrapped heading traces segregated by OFF and ON epochs and normalized to the initial heading,  
236 and generated heat maps of the resultant cumulative heading angle. We split the heat maps into two  
237 spatial windows, initial responses 0-200° of cumulative angle, and later responses of 200-500° range.  
238 For the initial accumulation of heading change, up to 200°, the heat maps between CsChrimson OFF  
239 and ON epochs were not obviously different across the three genotypes (**Figure 4C**, lower). However,  
240 light-gated depolarization of T3 neurons caused cessation of bar responses prior to a single 360°  
241 revolution around the circular arena, whereas controls and T4/T5>CsChrimson flies, on average,  
242 continued to steer throughout the trail (**Figure 4C**).

243 We next assessed how saccades were triggered under CsChrimson perturbation.  
244 T3>CsChrimson flies showed on average a dramatic increase in the number of saccades during the  
245 OFF epochs compared to the ON epochs, whereas the number of saccades was similar for T4/T5  
246 activated flies and Empty>CsChrimson controls (**Figure 4D**). These results indicate that, in  
247 agreement with the cumulative steering angle results, population depolarization of T3 neurons  
248 perturbed this visual pathway, reducing bar-evoked saccades. Yet, when the optogenetic stimulus was

249 switched OFF, recovery from sustained depolarization strongly revived saccadic bar tracking in flies  
 250 expressing CsChrimson in T3 (**Figure 4D**).

251 We next tested whether saccade dynamics were affected by optogenetic stimulation of T3.  
 252 Saccade duration was affected neither by CsChrimson expression nor optical condition in any  
 253 genotype (**Figure 4E**). Saccade amplitude increased modestly in all genotypes likely due to an artifact  
 254 of the red light (Klapoetke et al., 2014; Wu et al., 2016), but in T4/T5 this effect was pronounced  
 255 (**Figure 4E**). Without any change in saccade duration, the increase in saccade amplitude in T4/T5  
 256 activated flies yielded a correspondingly strong increase in saccade angular velocity only for  
 257 T4/T5>CsChrimson (**Figure 4F**). In controls and T3 activated flies the saccade angular velocity was  
 258 similar for OFF and ON optogenetic stimulation epochs. These results indicate that although normal  
 259 T3 function is required for triggering saccades to track moving objects (**Figure 3** and **4B-D**), T3

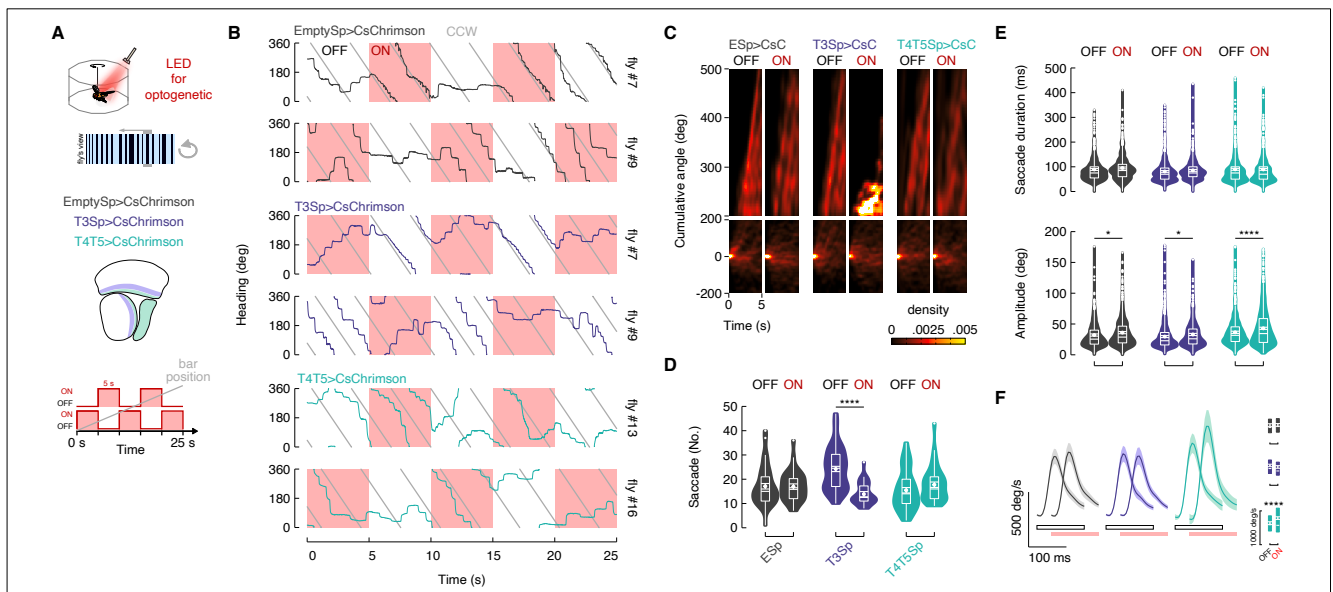

**Figure 4.** Depolarization of T3 increases bar tracking saccades. **(A)** Top: cartoon of the magno-rigid setup implemented with an optogenetic LED for cells' stimulation. Middle: genotypes tested and schematic representation of the optic lobe regions innervated by T3 and T4/T5. Bottom: schematic representation of the stimulation protocol: repetition of 5 s optogenetic LED on followed by 5 s LED off for 25 s. On/off starting was randomly selected. **(B)** Wrapped heading traces from six representative flies (dark: EmptySp>CsChrimson; magenta: T3Sp>CsChrimson; green: T4/T5Sp>CsChrimson) responding to a CCW revolving motion-defined bar as in **Figure 3A**. Red shaded regions represent periods of LED on. EmptySp>CsChrimson and T4/T5EmptySp>CsChrimson flies were slightly affected by the LED on while T3Sp>CsChrimson flies stop chasing the bar or start to turn CW. **(C)** Heat maps of the cumulative angular distance traveled by flies within bins of 5 s in the three genotypes during the rotation of a motion-defined bar ( $n = 20$  EmptySp>Kir2.1,  $n = 22$  T3Sp>Kir2.1,  $n = 21$  T4/T5>Kir2.1). The map was divided in two windows to highlight the late component of the response where T3Sp>CsChrimson flies remain stuck during the stimulation periods. **(D)** Violin-box plots of number of bar tracking saccades during the periods of on and off stimulations (pairwise post-hoc comparisons adjusted Bonferroni, EmptySp:  $p = 1$ ; T3Sp:  $p < .0001$ ; T4/T5Sp:  $p = 1$ ). **(E)** Top: violin-box plots of saccade duration between on and off stimulations (pairwise post-hoc comparisons adjusted Bonferroni, EmptySp:  $p = .19$ ; T3Sp:  $p = .84$ ; T4/T5Sp:  $p = 1$ ). Bottom: violin-box plots of saccade amplitude by stimulation condition (pairwise post-hoc comparisons adjusted Bonferroni, EmptySp:  $p = .02$ ; T3Sp:  $p = .03$ ; T4/T5Sp:  $p < .0001$ ). **(F)** Left: average angular velocity (mean  $\pm$  s.e.m.) of saccades. Light gray and red horizontal bars at the bottom indicate the stimulation conditions (red: LED on; gray: LED off). Right: box plots of peak angular velocity in the on and off LED conditions (pairwise post-hoc comparisons adjusted Bonferroni, EmptySp:  $p = 1$ ; T3Sp:  $p = .05$ ; T4/T5Sp:  $p < .0001$ ).

260 neurons are not involved in controlling saccade amplitude (**Figure 4E**). By contrast, normal T4/T5  
261 function is essential to controlling saccade amplitude but not in triggering object tracking saccades  
262 (**Figure 3F** and **4E,F**).

263 Flies execute dynamically distinct classes of saccades for tracking objects, for avoiding  
264 objects, and for minimizing wide-field perturbations (Mongeau et al., 2019; Mongeau and Frye,  
265 2017). To test whether T3 signals are used specifically for object tracking saccades, we tested flies  
266 with a rotating wide-field panorama, no bar. Our prediction was that if T3 functions specifically for  
267 bar tracking saccades, then silencing them should have no influence over wide-field evoked saccades,  
268 and *vice versa* for T4/T5 neurons. In support of this prediction, the number of wide-field optomotor  
269 saccades in T3>CsChrimson flies did not change significantly between OFF and ON epochs but  
270 increased robustly for T4/T5>CsChrimson flies (**Figure 5A**). Saccade duration and amplitude were  
271 unaffected for any genotype or optical activation condition (**Figure 5B,C**). However, the angular  
272 velocity of wide-field evoked saccades increased for T4/T5 activated flies during ON epochs (**Figure**  
273 **5D**). Taken together, our results show that T4/T5>CsChrimson facilitates more optomotor saccades  
274 with higher velocity in response to both a small-field object and wide-field panorama, whereas the  
275 effects of T3>CsChrimson are specific to object tracking saccades.

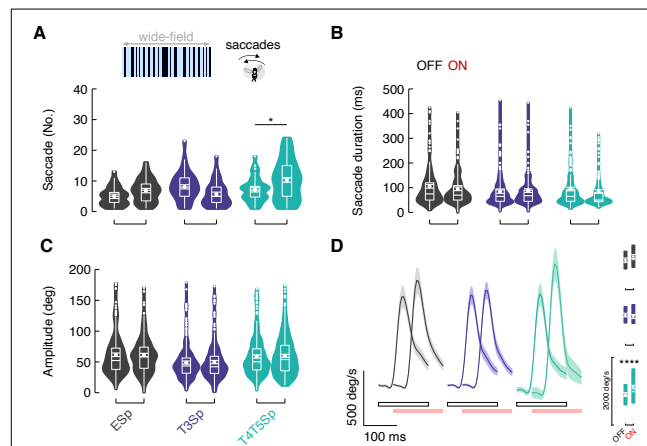

**Figure 5.** Depolarization of T4/T5 increases optomotor saccades. **(A)** Top: representation of the wide-field pattern of bright and dark random stripes rotating around the fly. Bottom: violin-box plots of number of optomotor saccades by stimulation condition (pairwise post-hoc comparisons adjusted Bonferroni, EmptySp:  $p = .89$ ; T3Sp:  $p = .19$ ; T4/T5Sp:  $p = .02$ ). **(B)** Optomotor saccade duration between on and off stimulations (pairwise post-hoc comparisons adjusted Bonferroni, EmptySp:  $p = .32$ ; T3Sp:  $p = 1$ ; T4/T5Sp:  $p = .08$ ). **(C)** Optomotor saccade amplitude by stimulation condition (pairwise post-hoc comparisons adjusted Bonferroni, EmptySp:  $p = 1$ ; T3Sp:  $p = 1$ ; T4/T5Sp:  $p = 1$ ). **(D)** Left: average angular velocity (mean  $\pm$  s.e.m.) of optomotor saccades. Light gray and red horizontal bars at the bottom indicate the stimulation conditions (red: LED on; gray: LED off). Right: box plots of peak angular velocity in the on and off LED conditions (pairwise post-hoc comparisons adjusted Bonferroni, EmptySp:  $p = 1$ ; T3Sp:  $p = 1$ ; T4/T5Sp:  $p < .0002$ ).

### 276 **T3 calcium dynamics support an integrate-and-fire model for triggering saccades**

277 Prior work has shown that bar-tracking saccades are triggered neither by absolute retinal  
278 position, nor by bar velocity, but rather by a threshold in the spatial integral of bar position over time  
279 (Mongeau and Frye, 2017). How could T3 contribute to this computation? For bar tracking saccades,  
280 the product of time (inter-saccadic interval, ISI) and angular distance traveled by the bar (pre-saccade  
281 error angle) is invariant across bar speed (Mongeau and Frye, 2017), and thus the terms are inversely  
282 proportional. When the bar moves fast, it generates a large pre-saccade error angle, a saccade is  
283 triggered early, and the inter-saccadic interval is short. When the bar moves slowly, the error angle  
284 is small, and the inter-saccadic interval is extended (**Figure 6A**). These spatial dynamics place  
285 constraints on T3 action, since the number of retinal facets and corresponding neural columns and T3  
286 neurons that are stimulated by object motion are proportional to object speed, and inversely related  
287 to the visual dwell time on each facet, parameters that highlight T3 function for triggering saccades.

288 Prior behavioral experiments (Mongeau and Frye, 2017) indicated that the fly's desired 'set  
289 point' or reference position of the bar is not visual midline, but rather is offset laterally approximately  
290  $26^\circ$  (**Figure 6A**, inset). If the bar moves quickly away from the reference position, then many retinal  
291 facets would be stimulated with little dwell time, whereas if the bar moves slowly, fewer facets would  
292 be stimulated but with larger dwell time on each. For a downstream integrating neuron, short dwell  
293 time corresponds to a low amplitude signal for a given columnar input, requiring many such signals  
294 to charge the integrator to threshold. If the bar moves slowly, larger amplitude signals mean fewer  
295 are needed to reach firing threshold. This scheme requires neural responses that are inversely  
296 proportional to bar speed, which we observed in T3 (**Figure 1I**): low amplitude calcium responses  
297 for fast moving bars, and large responses for slow moving bars.

298 Do T3's calcium responses scale to the behavioral data (**Figure 6B**) and support a  
299 spatiotemporal integrate-and-fire model? To test this hypothesis, we developed a simple  
300 physiological model for spatiotemporal integration. We fitted the curves of the GCaMP responses by  
301 using a nonlinear least squares method which allowed us to estimate the model parameters and to  
302 calculate the respective integrals ( $I_{Ca^{2+}}$ ) (**Figure 6C**, top). We used these fits in a model 1D cell array  
303 corresponding to the fly's horizontal visual midline (**Figure 6C**, bottom). An arbitrary threshold ( $I_{thr}$   
304 = 0.1) represents the integrated retinal position error and, since there is one T3 cell per medulla  
305 column (Takemura et al., 2015), we set the interommatidial angle ( $\Delta_\phi$ ) =  $4.5^\circ$ . By using a simple  
306 equation where we divided the  $I_{thr}$  by  $I_{Ca^{2+}}$  and then multiplied by  $\Delta_\phi$  (**Figure 6D**, inset), we computed  
307 the retinal position error at which flies would trigger a saccade based on the modeled T3's calcium  
308 responses (**Figure 6D**). The physiologically-inspired retinal position error fits very well on the curve



309 representing the behavioral relationship between retinal error and bar speed (Figure 6D). This  
 310 allowed us to calculate the number of columnar neurons that would have been stimulated prior to  
 311 triggering a saccade for each stimulus velocity (Figure 6D, lower). Depending on the bar speed  
 312 (hence the dwell time within each columnar cell's RF), the columnar activation of the cell array would  
 313 charge a downstream integrator to firing threshold for triggering a saccade (Figure 6E,F). A  
 314 simulated fly's position based on this physiologically-inspired control system recapitulates quite well  
 315 the real fly behavior (Supplementary Figure 5). Our simple model provides a parsimonious  
 316 explanation for how T3 neurons can provide behaviorally relevant signals to trigger object tracking  
 317 saccades.

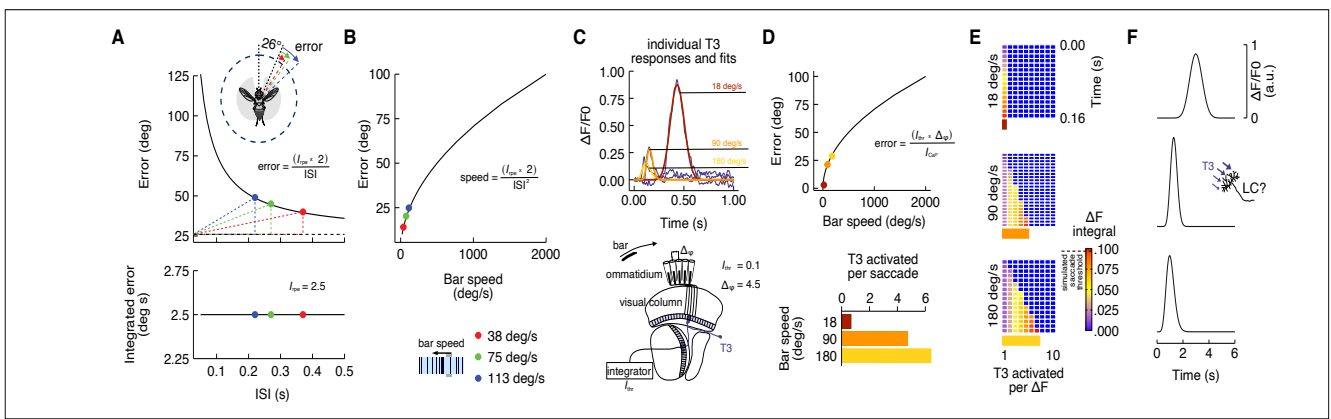

**Figure 6.** Integrate-and-fire model physiologically inspired on T3 calcium dynamic. (A) Top: pre-saccade error angles modeled by using the inverse function of the integrated error (Mongeau and Frye, 2017). Knowing the inter-saccadic intervals (ISI) from previous behavioral experiments as a function of the bar speed and the integrated retinal position error ( $I_{mpr}$ ), we can compute the pre-saccade error angle as a function of ISI. Modeled error angles are very close to the average errors from behavioral experiments (ISI = 0.22 s, Error = 49°; ISI = 0.27 s, Error = 45°; ISI = 0.37 s, Error = 40°). Dashed black line represents the threshold from which the integration of the bar position over time starts (26°). The area of the triangles defined by the dashed colored lines is constant and represents the  $I_{mpr}$ . Bottom: integrated retinal position error ( $I_{mpr} = 2.5^\circ$  s) derived from previous experiments work (Mongeau and Frye, 2017) that represents the multiplication of pre-saccade error angle by ISI. (B) Modeled pre-saccade error angle as a function of the bar speed. Higher speeds require larger pre-saccade error angles. (C) Top: average calcium responses of T3 neurons (magenta) to a moving motion-defined bar at three different speeds (data from Figure 1I). These responses were fitted using nonlinear regression analysis (yellow: 180° s<sup>-1</sup>; orange: 90° s<sup>-1</sup>; red: 18° s<sup>-1</sup>). Areas under the curves were computed ( $I_{Ca^{2+}}$ ). Bottom: schematic representation of the fly visual lobe with a 1D organization of T3 neurons that are sequentially activated by a moving bar across the retina. A T3 neuron is present in each column and the interommatidial angle ( $\Delta\phi$ ) is  $\sim 4.5^\circ$ . We set an arbitrary integrated threshold ( $I_{thr} = 0.1$ ) that a downstream partner of T3 would use to trigger a saccade. (D) Top: modeled pre-saccade error angles based on  $I_{Ca^{2+}}$  for different speeds ( $\Delta\phi$  is known and  $I_{thr}$  is arbitrary). These error values scale exactly like the modeled behavioral pre-saccade errors as a function of speed. Bottom: number of T3 cells that in a 1D space would be required to trigger a saccade according to the model. (E) Space-time plots of  $I_{mpr}$  accumulating over time across cells depending on the bar speed. (F) Simulated responses by speed of a hypothetical integrator downstream of T3 neurons. LC17 cells might play this role.

## 318 Discussion

319 Like virtually every animal with image forming eyes, including humans, flies use smooth  
320 optomotor movements to stabilize gaze and to maintain visual course control during locomotion  
321 (Land, 1992). It is widely accepted that optomotor stabilization reflexes in flies are elicited by patterns  
322 of wide-field optic flow, which is detected by spatially integrating the signals from two identified  
323 classes of directionally selective motion detecting neurons, T4 and T5, columnar neurons with narrow  
324 receptive fields (small-field) that sample the entire visual field (Mauss and Borst, 2020; Yang and  
325 Clandinin, 2018). T4/T5 neurons innervate the lobula plate, where they synapse with wide-field  
326 collating neurons such as the horizontal system class (Shinomiya et al., 2022) of lobula plate  
327 tangential cells (LTPCs). LTPCs have complex directional receptive fields that act as spatial filters  
328 for the patterns of optic flow generated by specific flight maneuvers, and which in turn coordinate  
329 smooth optomotor responses (Busch et al., 2018).

330 In parallel with smooth continuous optomotor movements, flies, like humans, also execute  
331 saccades to shift gaze, both during walking (Geurten et al., 2014) and in flight to track or avoid salient  
332 moving objects (Mongeau et al., 2019; Mongeau and Frye, 2017). Models of smooth optomotor visual  
333 stabilization do not account for saccadic object pursuit (Fenk et al., 2014; Reichardt and Poggio,  
334 1976), which instead are believed to be coordinated by a pathway operating in parallel to T4/T5  
335 directional motion detectors (Aptekar et al., 2012; Bahl et al., 2013). Here we provide evidence for  
336 the identity of this parallel pathway; columnar T3 neurons arise from the same optic ganglion as  
337 T4/T5, but rather than innervating the lobula plate center for motion vision, T3 terminate in the outer  
338 lobula, a center of visual feature detection (Keleş and Frye, 2017a). To date, what is known of T3  
339 cholinergic chemical synapses (Konstantinides et al., 2018) includes lobula columnar projection  
340 neurons LC11 and LC17 (Tanaka and Clark, 2022). LC11 is a small object movement detector that  
341 plays no role in flight control, but rather seems to coordinate conspecific social interactions (Ferreira  
342 and Moita, 2020; Keleş and Frye, 2017b). A behavioral screen of freely walking flies showed that  
343 optogenetic activation of LC17 induced turning responses (Wu et al., 2016), and LC17 has been  
344 shown to respond to looming stimuli (Klapoetke et al., 2022), but any potential role in saccadic object  
345 tracking is unknown.

346 The receptive field properties of T4/T5 are well suited to control smooth, directional  
347 optomotor responses, whereas T3 are better suited to detect the features of visual objects that flies  
348 track. For example, T4 and T5 are half-wave rectified for contrast increments and decrements,  
349 respectively, and are tuned to the temporal frequency of a moving pattern (Joesch et al., 2010). By  
350 contrast, T3 are distinguished from T4/T5 (and also from neighboring T2a neurons) by full wave

351 rectification (Keleş et al., 2020) (i.e., ON-OFF selectivity), omnidirectionality, and broad sensitivity  
352 to temporal frequency sensitivity (Figure 1 and Supplementary Figure 2). T3 responds vigorously to  
353 the high frequency (finely textured) stimuli that robustly drive object tracking behavior in flight  
354 (Figure 1), whereas these same object stimuli drive T4/T5 to a significantly lesser extent (Keleş et  
355 al., 2018).

356 To our knowledge, this is the first identification of a visual neuron type that specifically serves  
357 saccadic object tracking behavior (Mongeau et al., 2019; Mongeau and Frye, 2017). However, T3  
358 does not act alone in this capacity. Our evidence suggests that T4/T5 coordinates distinct components  
359 of saccadic tracking behavior, possibly via identified projection neurons that interconnect the lobula  
360 plate and deeper layers of the lobula (Shinomiya et al., 2022). A control theoretic model that accounts  
361 well for the properties of saccadic object tracking requires two key computations: (1) an integrate-  
362 and-fire threshold operation to trigger a saccade, which depends upon the accumulation of retinal  
363 error, and (2) a torque magnitude variable that regulates saccade amplitude, which depends upon  
364 object direction and speed (Mongeau and Frye, 2017). Our evidence suggest that T3 neurons  
365 participate in triggering saccades, because their synaptic perturbation suppresses both orientation  
366 steering effort by the wings (Figure 2) and object pursuit saccades (Figure 3 and 4), while a model  
367 based on the integrated output of T3 neurons captures the spatiotemporal threshold dependence of  
368 bar tracking behavior (Figure 6). By contrast, our evidence shows that directional motion detectors  
369 T4 and T5 coordinate saccade amplitude, because constitutive synaptic blockade reduces saccade  
370 amplitude (Figure 3), and depolarization increases saccade amplitude (Figure 4). Finally, T3  
371 perturbation does not influence the control of wide-field evoked saccades (but silencing T4/T5 does),  
372 an important result that highlights T3 selective role in object tracking saccades (Figure 5). Our  
373 working model is no doubt an incomplete accounting of all of the underlying control circuit  
374 interactions. Nevertheless, we have for the first time provided a strong conceptual framework, and  
375 identified its key elements, for the parallel neural control of smooth optomotor stabilization and  
376 saccadic object tracking control systems within a key model system.

## 377 **Methods**

### 378 **Fly Strains**

379 For all experiments we used 3-5 days old female *Drosophila melanogaster* reared on standard  
380 cornmeal molasses at 25°C, 30%-50% humidity entrained to 12 h light/12 h dark cycle. All behavioral  
381 experiments involving silencing of targeted neurons were performed with flies carrying at least one

382 wild-type *white* allele. We were not blind to genotype. Fly lines and their origins are listed in  
383 Supplementary Table 1 and 2.

### 384 **Imaging setup**

385 Two-photon calcium imaging was performed on a modified upright microscope (Axio  
386 Examiner, Zeiss), exciting the specimens with a Ti:Sapphire laser (Chameleon Vision, Coherent)  
387 tuned to 920 nm (power at the back aperture  $\sim 25$  mW). We imaged with a 20x water-immersion  
388 objective (W Plan-Apochromat 20x/1.0 DIC, Zeiss). Data acquisition was controlled by Slidebook  
389 (version 6, 3i). Single plane images were taken at  $\sim 10$  Hz with a spatial resolution of approximately  
390  $285 \times 142$  pixels ( $100 \times 50$   $\mu\text{m}$ , pixel size  $\cong 0.35$   $\mu\text{m}$ , dwell time  $\cong 2.5$   $\mu\text{s}$ ). GCaMP6f responses were  
391 recorded from the presynaptic terminals of T3 neurons. For each preparation, we identified the most  
392 caudal presynaptic terminals and then shifted the ROI downwards  $\sim 30$   $\mu\text{m}$ . Images and external  
393 stimulations were synchronized *a posteriori* using frame capture markers (TTL pulses output from  
394 Slidebook) and stimulus events (analog outputs from the LED display controller) sampled with a data  
395 acquisition device (DAQ) (PXI-6259, NI) at 10 kHz. The DAQ interfaced with MATLAB (R2020a,  
396 MathWorks) via rack-mount terminal block (BNC-2090, NI).

### 397 **Fly preparation for imaging**

398 Flies were cold anesthetized at  $\sim 4^\circ\text{C}$  by using a thermoelectric cooling system and mounted  
399 on a custom 3D printed fly holder (Weir and Dickinson, 2015). Specifically, flies were gently pushed  
400 through a hole etched on a stainless-steel shim so that the dorsal thorax protruded from the dorsal  
401 aspect of the horizontally mounted shim and the ventral thorax with the abdomen remained below.  
402 The head was pitched forward to expose its posterior surface without stretching the neck connective.  
403 Flies were secured using UV-curable glue (44600, Dreve Fotoplast Gel) around the posterior-dorsal  
404 cuticle of the head capsule, and across the dorsal thorax. To reduce movement artifacts during the  
405 recordings, we immobilized the legs and the proboscis with low melt point bees-wax (Waxlectric-1,  
406 Renfert). We used fine forceps (Dumont #5SF, Fine Science Tools) to remove the posterior cuticle,  
407 fat bodies and post-ocular air-sac obstructing the view of the right optic lobe. We severed muscles 1  
408 and 16 to reduce brain movements (Demerec, 2008). The brain was bathed in physiological saline  
409 containing (in mM): 103 NaCl, 3 KCl, 1.5 CaCl<sub>2</sub>, 4 MgCl<sub>2</sub>, 26 NaHCO<sub>3</sub>, 1 NaH<sub>2</sub>PO<sub>4</sub>, 5 N-Tris  
410 (hydroxymethyl) methyl-2-aminoethane-sulfonic acid (TES), 10 trehalose, 10 glucose, 2 sucrose. The  
411 saline was adjusted to an osmolarity of 273-275 mOsm and a pH of 7.3-7.4. The brain was  
412 continuously perfused with extracellular saline at 1.5 ml/min via a gravity drip system and the bath

413 was maintained at 22°C by an inline solution heater/cooler (SC-20, Warner Instruments) and  
414 temperature controller (TC-324, Warner Instruments).

### 415 **Visual stimuli for imaging**

416 During two-photon imaging, visual stimuli were presented on a LED display (Reiser and  
417 Dickinson, 2008) composed of 48 panels arranged in a semi-cylinder (Panels arena, IO Rodeo). The  
418 display covered  $\pm 108^\circ$  in azimuth and  $\pm 32^\circ$  in elevation. Each LED subtended a visual angle of  $\sim$   
419  $2.25^\circ$ . To reduce the light intensity from the LED display, three layers of blue filter (R59-indigo,  
420 Rosco) were placed over the display. The display had, at its maximum intensity, an irradiance of  $\sim$   
421  $0.11 \mu\text{W m}^{-2}$  (recorded at the fly's position) at the spectral peak of 460 nm (full width at half  
422 maximum: 243 nm). Visual patterns were generated and controlled using custom-written MATLAB  
423 scripts that communicated to a custom designed controller (IO Rodeo) via a serial port, which in turn  
424 communicated to the panels via a rapid serial interface ([https://reiserlab.github.io/Modular-LED-  
425 Display/Generation%203/](https://reiserlab.github.io/Modular-LED-Display/Generation%203/)). To account for the angle the fly's head had when mounted on the holder,  
426 the display was tilted  $30^\circ$  from the horizontal plane. We recorded from the right optic lobe, and the  
427 stimulus coordinates are referred to the fly's head position (Figure 1c). Therefore, azimuthal and  
428 elevation position of the stimuli are centered to the fly's visual equator and prime meridian.

### 429 **Speed tuning**

430 Visual stimulation was confined to the right half of the visual field, ipsilateral to the recording  
431 site. Due to the far peripheral blind spot generated by the imaging stage, visual stimuli were presented  
432 within a restricted window of  $72^\circ \times 72^\circ$  with the left edge abutting the visual prime meridian. The  
433 brightness of the display background, outside the stimulus window, was set to 50% maximum. The  
434 stimulus set was presented in random block design, repeated 3 times. Each visual stimulation lasted  
435 7.5 s and was composed by 0.5 s of uniform background (50% maximum intensity), 0.5 s of static  
436 pattern onset within the stimulation window, variable duration (depending on the stimulus speed)  
437 visual motion (maximum 4.5 s) followed by 2 s lingering static pattern. After each visual stimulation,  
438 2 s of rest with the display off (0% of maximum intensity) interspersed the trials to prevent adaptation.

### 439 **Receptive field mapping and directional selectivity**

440 As previously described (Städele et al., 2020), to characterize the functional receptive field  
441 (RF) of T3 and T2a neurons, we computed the integrated responses to a  $2.25^\circ \times 72^\circ$  (width x height)  
442 dark bar (single pixel stripe) moving horizontally with the responses to a  $72^\circ \times 2.25^\circ$  dark bar moving  
443 vertically. The single pixel dark stripe moved within a  $9^\circ$  spaced bin (4 pixels) in all four cardinal  
444 directions (upward, downward, leftward and rightward) at  $18^\circ \text{ s}^{-1}$ , allowing us to extract directional



445 selectivity information. Sweep trials of different directions were randomly presented over a region of  
446 the visual field between  $0^\circ$  and  $90^\circ$  in azimuth and between  $-36^\circ$  and  $+36^\circ$  in elevation. We divided  
447 this region in 10 horizontal bins (each one of  $9^\circ \times 72^\circ$ ) and 8 vertical bins (each one of  $90^\circ \times 9^\circ$ ).  
448 Each sweep (36 in total) was composed of 6 s of rest period with a uniform bright background (50%  
449 of maximum intensity) and 0.5 s of stripe motion within a bin. Since we did not observe differences  
450 in the directional selectivity of T3 and T2a for horizontal or vertical sweeps, leftward and rightward  
451 movement responses were averaged, as well as downward and upward responses. To assess the RF  
452 size, these averaged time series for the 10 horizontal bins and the 8 vertical bins were multiplied  
453 together, obtaining a matrix of activity (Figure 1f). The matrix for each fly was then simplified by  
454 taking the values of activity peak and spatially normalized to the bin showing the maximum activity  
455 peak (RF center). Finally, the peak values were normalized to the value at the center of the RF (bin  
456 #0). We averaged the normalized matrices for each fly to obtain a heatmap of the RF for T3 neurons  
457 (Figure 1G). The directional selectivity was estimated by considering the activity peaks of the RF  
458 center for each sweep separately and plotting them in a polar plot (Figure 1H). Flies whose  
459 anteroposterior imaging plane moved during the experiment were no longer considered for the  
460 analysis.

#### 461 **Imaging data analysis**

462 Image stacks were exported from Slidebook (™) in (16-bit) .tiff format and imported into  
463 MATLAB for analysis. A user-friendly custom toolbox developed by Ben J. Hardcastle  
464 (<https://github.com/bjhardcastle/SlidebookObj>) allowed us to correct the images for motion artifacts  
465 along the x-y plane using a DFT-based registration algorithm (Guizar-Sicairos et al., 2008) and to  
466 manually draw a region of interest (ROI) around the presynaptic terminal of an active neuron located  
467 approximately in the middle of the lobula. We opted for a manual identification of the ROI to  
468 specifically consider morphology and position of the neuron investigated. Through this approach,  
469 combined with the consistent z-position of our imaging plane, we were able to identify T3 neurons  
470 across preparations at the same location in the neuropile, exhibiting similar spatial receptive fields.  
471 A time-series was generated by calculating the mean fluorescence intensity of pixels within the ROI  
472 in each frame ( $F_t$ ). These mean values were then normalized to a baseline value as  $\Delta F/F = (F_t - F_0)/F_0$ ,  
473 where  $F_0$  was the mean of  $F_t$  during the 0.5 s preceding stimulus onset. To compute average time-  
474 series across preparations with small variations in TTL synchronization, traces were resampled using  
475 linear interpolation. This procedure did not cause any detectable change in the original data.

## 476 **Rigid-tether setup**

477 In the rigid tether paradigm, flies were cold anesthetized at  $\sim 4^{\circ}\text{C}$  and tethered to tungsten  
478 pins (diameter: 0.2 mm) using UV-curable glue (Watch Crystal Glue Clear). The pin was placed on  
479 the dorsal thorax so as to get a final pitch angle of the fly (between  $35^{\circ}$  and  $45^{\circ}$ ) similar to body angle  
480 and wing stroke plane during free hovering (Fry et al., 2003). Before running the experiment, flies  
481 were left to recover upside-down in a custom designed pin holder, in turn placed into a covered acrylic  
482 container, for  $\sim 30$  min at room temperature ( $\sim 22^{\circ}\text{C}$ ). Inside the container, we put a small bowl filled  
483 with water to maintain humidity and avoid desiccation. To reduce flight energy expenditure, as soon  
484 as flies recovered from the anesthesia and started flying, we gently offered them a small square piece  
485 of paper (Kimwipes, Kimberley-Clark)  $\sim 3$  mm side, that they generally clung to with their legs  
486 without flying. Flies were then positioned in the center of a cylindrical LED panel display (Reiser  
487 and Dickinson, 2008) that covered  $\pm 165^{\circ}$  in azimuth and  $\pm 47^{\circ}$  in elevation. The display was  
488 composed of 96(h) x 32(v) LEDs (emission peak: 568 nm) each LED subtending  $3.75^{\circ}$  on the fly's  
489 retina. Flies were illuminated from the top with an infrared diode (emission peak: 880 nm) which cast  
490 a shadow of the beating wings onto an optical sensor. An associated "wing-beat analyzer" (JFI  
491 Electronics Laboratory, University of Chicago) converted the optical signal into an instantaneous  
492 voltage measuring right and left wing beat amplitude (WBA) and frequency (WBF). The difference  
493 in the left and right WBA ( $\Delta\text{WBA}$ ), which is highly correlated with the fly's steering effort in the  
494 yaw axis (Tammero et al., 2004), connected to the panel display controller to close a feedback loop  
495 with the rotational velocity of the visual display. Signals from the wing-beat analyzer and from the  
496 panel display controller, encoding the visual display position, were recorded on a DAQ (Digidata  
497 1440A, Molecular Devices) at 1 kHz. The data acquisition was triggered through a voltage step sent  
498 by a second DAQ (USB-1208LS, Measurement Computing) interfaced with MATLAB that in turn  
499 controlled the pattern presentations. For silencing experiments, flies expressing Kir2.1 tagged with  
500 green fluorescence protein (GFP) were dissected after the behavioral recordings under a fluorescence  
501 stereomicroscope (SteREO Discovery.V12, Zeiss) to confirm the expression in the targeted cells.

## 502 **Rigid-tether visual stimuli**

503 Each trial was composed of 5 s in closed-loop with a bar and a variable time in open-loop test  
504 depending on the speed of the stimuli presented to the fly. The closed-loop periods ensured the fly  
505 was engaged in the task, while the open-loop periods were tested for responses to the visual stimuli.  
506 A full set of stimuli was randomized and repeated 3 times, with a total duration of  $\sim 5$  min. Flies that  
507 stopped flying during the experiment or that failed to frontally fixate a dark bar on a uniform bright  
508 background during a pre-experiment assessment period, were not included in the analysis. All stimuli

509 used in these experiments had patterns of bright (100% of maximum intensity) and dark pixels (0%  
510 of maximum intensity). The luminance-defined bar represented a  $30^\circ \times 94^\circ$  (width x height) dark bar  
511 moving on a uniform bright background. The motion-defined bar represents a  $30^\circ \times 94^\circ$  bar of random  
512 bright and dark vertical stripes moving over an analog static background of randomly distributed  
513 bright and dark stripes. This pattern was generated using a custom-written MATLAB code as  
514 previously described (Keleş et al., 2018). Briefly, the random-stripes patterns had an equal number  
515 of bright and dark pixels and a high-pass filter ensured that no bright or dark contiguous stripes  
516 exceeded  $22.5^\circ$  in width (6 stripes). A random-stripes pattern was randomly picked up, every time it  
517 was needed, from 96 different options to avoid pattern-specific behavioral artifacts. Clockwise (CW)  
518 and counter-clockwise (CCW) directions were always considered in bar revolving experiments.  
519 However, assuming bilateral symmetry, we reflected the time series responses to counter-clockwise  
520 (CCW) stimuli and pooled them with clockwise (CW) responses.

## 521 **Magnetic-tether setup**

522 In the magnetic tether paradigm, flies were cold anesthetized as for the rigid tether paradigm  
523 and glued to stainless steel pins (diameter: 0.1 mm, Fine Science Tools) as previously described  
524 (Bender and Dickinson, 2006; Duistermars and Frye, 2008; Mongeau and Frye, 2017). Briefly, pins  
525 were trimmed to be 1 cm length and placed on the dorsal thorax in order to get a final fly's pitch angle  
526 of approximately  $30^\circ$ . Flies were then left to recover for  $\sim 30$  min upside-down sticking out of a  
527 polystyrene block. To reduce flies' fatigue, as done for the rigid tether paradigm, flies were provided  
528 with a small piece of paper. The visual stimulation was performed using a cylindrical LED panel  
529 display covering  $360^\circ$  in azimuth and  $56^\circ$  in elevation (array of  $96 \times 16$  LEDs, emission peak: 470  
530 nm). At the display horizontal midline, each LED subtended an angle of  $3.75^\circ$  on the fly's retina. The  
531 fly was suspended between two magnets that maintained the animal in place and free to rotate about  
532 its vertical axis (i.e., yaw axis). The pin was attracted at its top end toward the upper magnetic pivot  
533 and its moment of inertia encompassed less than 1% of the fly's moment of inertia (Bender and  
534 Dickinson, 2006; Fry et al., 2003). The fly was illuminated from below with an array of eight infrared  
535 diodes (emission peak: 940 nm) and recorded from the bottom with an infrared-sensitive camera  
536 (Blackfly S USB3, Teledyne FLIR) fitted with a zoom lens (InfiniStix 0.5x/0.024, Infinity Photo-  
537 Optical) at  $200 \text{ frames s}^{-1}$ . The lens also held a long pass filter to block the light emitted by the display  
538 (NIR, Edmund Optics). At the beginning of each trial, after ten seconds of acclimatation, the fly was  
539 presented for 20 s with a rotating wide-field panorama, which elicited strong optomotor responses, in  
540 each direction (CW and CCW). Flies whose behavior was characterized by excessive wobble  
541 indicating poor tethering, were discarded.

## 542 **Magnetic-tether visual stimuli**

543 Visual stimuli consisted in a motion-defined bar ( $30^\circ \times 56^\circ$ ) and a wide-field panorama ( $360^\circ$   
544  $\times 56^\circ$ ) of random bright and dark vertical stripes rotating horizontally around the fly in CW and CCW  
545 directions at  $112.5^\circ \text{ s}^{-1}$ . We decided to use these stimuli because previous experiments conducted in  
546 our laboratory showed that motion-defined bars elicit a higher number of body-saccades compared  
547 to solid luminance-defined bars ( $\sim 50\%$  more) (Mongeau and Frye, 2017). For similar reasons, the  
548 speed selected elicits robust bar tracking behavior (Mongeau and Frye, 2017). Both stimuli were  
549 generated, as mentioned above, using custom-written MATLAB code and randomly chosen during  
550 each trial among 96 different patterns. Each trial involved 25 s of a rotating stimulus at constant speed  
551 and 5 s of resting period in which the stimulus stopped moving. For the bar, the initial position was  
552 selected from a pseudo-random sequence. Each fly was tested in four different and randomized trials  
553 (2 stimuli  $\times$  2 directions) without repetitions to minimize habituation. The full experiment lasted  $\sim 3$   
554 min. Only flies that either flew continuously or stopped briefly only once were included in the  
555 analysis.

## 556 **Optogenetic stimulation**

557 Optogenetic experiments were conducted in a setup similar to the one used for magnetic-  
558 tether experiments. Likewise, a cylindrical LED panel display (array of  $96 \times 16$  LEDs, emission peak:  
559  $470 \text{ nm}$ ) was used and two layers of neutral filter were placed over the display to reduce the light  
560 intensity. A red LED (emission peak:  $685 \text{ nm}$ ,  $4\text{V}$ ) was positioned laterally to the post bearing the  
561 magnetic pivot within which the fly was suspended. Its beam covered the entire fly and, since the fly  
562 freely rotated around the yaw axis. Thus, the angle of illumination varied during flight. We used the  
563 same visual stimuli, speed, directions and trial duration used in magnetic-tether experiments. On top  
564 of visual rotating stimuli, flies were exposed to contiguous epochs of LED On and Off which lasted  
565  $5 \text{ s}$  each. The starting optogenetic epoch was randomly selected so that flies could start the trial with  
566 the LED On or Off. This means that during the  $25 \text{ s}$  of visual stimulation, flies could be  
567 optogenetically stimulated for either  $10 \text{ s}$  or  $15 \text{ s}$  in total. After every stimulation, flies were left to  
568 rest for  $5 \text{ s}$  facing a static random-stripes pattern. Moreover, we included trials where the LED  
569 remained Off throughout the visual stimulation. The experiment lasted  $\sim 6 \text{ min}$  ( $30 \text{ s} \times 3 \text{ LED}$   
570  $\text{intensities} \times 2 \text{ stimuli} \times 2 \text{ directions}$ ). As done for the magnetic-tether experiments, we discarded flies  
571 that showed signs of poor tethering preparation (i.e., asymmetric wing beat amplitude). All-trans-  
572 retinal (ATR) is required to get a proper CsChrimson protein conformation. In order to boost flies'  
573 performance, although flies endogenously produce retinal, we added ATR to the food. The progeny  
574 from the crosses between driver lines and UAS-CsChrimson reporter were raised in the darkness to

575 avoid the channel's stimulation. After eclosion, newborn flies were transferred in 0.5 mM ATR food  
576 and kept there for 3-5 days until the experiment.

## 577 **Behavioral analysis**

578 Data collected either in the rigid-tether or in the magno-tether setups were analyzed in RStudio  
579 (RStudio Team, 2021) using custom R scripts. Axon binary files (.abf) from the DAQ used in rigid  
580 tether experiments were imported by using the R package *abf2* (Caldwell, 2015) and pre-processed  
581 (data filtering) as previously described (Keleş et al., 2018). Video recordings from the camera on the  
582 magno-tether setup were imported into MATLAB and the flies' heading offline tracked by using  
583 custom scripts. Video heading files and DAQ files were then imported into RStudio by using the R  
584 package *R.matlab* (Bengtsson, 2018). Saccade detection and tracking bouts were analyzed as  
585 previously described (Mongeau and Frye, 2017). Data plotting was performed by R package *ggplot2*  
586 (Wickham, 2016).

## 587 **Model**

588 In the integrator-and-fire model physiologically-inspired on T3 neurons, the nonlinear least-  
589 squares estimates of the parameters of the fitted calcium imaging responses were computed in  
590 RStudio (RStudio Team, 2021) using a nonlinear regression analysis (Bates, 1988). We used the *nls*  
591 function with a predefined model formula inspired to the probability density function of a Beta  
592 distribution  $y = (x^{\alpha-1}) \times (1-x)^{\beta-1}) \times \gamma$ , where  $\alpha$  and  $\beta$  are shape parameters, while  $\gamma$  is a  
593 scaling factor. These models minimized the number of parameters, while maintaining wide flexibility  
594 and goodness of fit. The behavioral control model was simulated in Simulink (MATLAB).

## 595 **Statistics**

596 Generalized linear mixed effects (GLME) models were used to fit the data in order to consider  
597 the random effects represented by individual flies. GLME models avoid averaging that reduces the  
598 statistical power and allows for adjusting the estimates for repeated sampling and for sample  
599 imbalancing. We fitted the data using the R package *lme4* (Bates et al., 2015). Analysis of Variance  
600 (ANOVA) was computed on the estimated parameters by the models. Pairwise post-hoc comparisons  
601 corrected with Bonferroni method on the fixed effects of the models were then performed using the  
602 R package *emmeans* (Lenth, 2021). In violin-box plots, mean and median were reported as central  
603 tendency measures, bottom and top edges of the box represent 25th (Q1) and 75th (Q3) percentiles  
604 and whiskers represent the lowest and highest datum within 1.5 interquartile range (Q3 - Q1).



605 **Supplementary Table 1.** Origin of reagents used in this study.

| Reagent type                                                                             | Source                                    | Identifier     |
|------------------------------------------------------------------------------------------|-------------------------------------------|----------------|
| <i>D. melanogaster</i> : Empty-SplitGal4 [(p65ADZp.Uw(attP40); ZpGDBD.Uw(attP2))]        | Bloomington<br>Drosophila<br>Stock Center | BDSC<br>#79603 |
| <i>D. melanogaster</i> : T3-SplitGal4 [VT002055-p65ADZp(attP40); R65B04-ZpGDBD(attP2)]   | (Keleş et al., 2020)                      | N/A            |
| <i>D. melanogaster</i> : T2a-SplitGal4 [VT012791-p65ADZp(attP40); R47E02-ZpGDBD(attP2)]  | (Keleş et al., 2020)                      | N/A            |
| <i>D. melanogaster</i> : T4/T5-SplitGal4 [R59E08-p65.AD(attP40); R42F06-Gal4.DBD(attP2)] | G. Rubin                                  | N/A            |
| <i>D. melanogaster</i> : 20XUAS-IVS-GCaMP6f(VK00005)                                     | Bloomington<br>Drosophila<br>Stock Center | BDSC<br>#52869 |
| <i>D. melanogaster</i> : 10XUAS-IVS-eGFP-Kir2.1(attP2)                                   | (von Reyn et al., 2017)                   | N/A            |
| <i>D. melanogaster</i> : 20xUAS-Chrimson::tdTomato(VK00005)                              | D. Anderson                               | N/A            |

606 **Supplementary Table 2.** Genotypes and experimental parameters used in each figure.

| Description      | Genotype                                                                      | Experiment                                                                                                                                                                          | Figure #                                     | Flies # | Trial # |
|------------------|-------------------------------------------------------------------------------|-------------------------------------------------------------------------------------------------------------------------------------------------------------------------------------|----------------------------------------------|---------|---------|
| T3Sp>GCaM<br>P6f | w <sup>+/+</sup> ;<br>VT002055-<br>AD/+;<br>R65B04-<br>DBD/20xUA<br>S-GCaMP6f | ON and OFF moving bars (9° width) in two directions (front-to-back and back-to-front) at three different speeds (18° s <sup>-1</sup> , 90° s <sup>-1</sup> , 180° s <sup>-1</sup> ) | Figure 1D;<br>Supplement<br>ary Figure<br>1A | 11      | 3       |
| T3Sp>GCaM<br>P6f | w <sup>+/+</sup> ;<br>VT002055-<br>AD/+;<br>R65B04-                           | Single pixel OFF bar (2.25° width) moving in four different directions (upward, downward, leftward and rightward) at 18° s <sup>-1</sup>                                            | Figure 1G,I                                  | 5       | 2       |

|                   |                                                                               |                                                                                                                                                                                                                                   |                           |    |   |
|-------------------|-------------------------------------------------------------------------------|-----------------------------------------------------------------------------------------------------------------------------------------------------------------------------------------------------------------------------------|---------------------------|----|---|
|                   | DBD/20xUA<br>S-GCaMP6f                                                        |                                                                                                                                                                                                                                   |                           |    |   |
| T3Sp>GCaM<br>P6f  | w <sup>-</sup> /+;<br>VT002055-<br>AD/+;<br>R65B04-<br>DBD/20xUA<br>S-GCaMP6f | Motion-defined bars (9° width) moving in two directions (front-to-back and back-to-front) at three different speeds (18° s <sup>-1</sup> , 90° s <sup>-1</sup> , 180° s <sup>-1</sup> )                                           | Figure 1I                 | 11 | 3 |
| T3Sp>GCaM<br>P6f  | w <sup>-</sup> /+;<br>VT002055-<br>AD/+;<br>R65B04-<br>DBD/20xUA<br>S-GCaMP6f | Gratings patterns of $\lambda=18^\circ$ moving at three different temporal frequency (1 Hz, 2 Hz and 5 Hz) in two directions (front-to-back and back-to-front) and gratings of $\lambda=36^\circ$ moving at 1 Hz, 2 Hz and 2.5 Hz | Supplementary Figure 1B,C | 11 | 3 |
| T2aSp>GCa<br>MP6f | w <sup>-</sup> /+;<br>VT012791-<br>AD/+;<br>R47E02-<br>DBD/20xUA<br>S-GCaMP6f | Single pixel OFF bar (2.25° width) moving in four different directions (upward, downward, leftward and rightward) at 18° s <sup>-1</sup>                                                                                          | Supplementary Figure 2C,D | 4  | 2 |
| T2aSp>GCa<br>MP6f | w <sup>-</sup> /+;<br>VT012791-<br>AD/+;<br>R47E02-<br>DBD/20xUA<br>S-GCaMP6f | ON, OFF and motion-defined moving bars (9° width) in two directions (front-to-back and back-to-front) at three different speeds (18° s <sup>-1</sup> , 90° s <sup>-1</sup> , 180° s <sup>-1</sup> )                               | Supplementary Figure 2E,F | 9  | 3 |
| T2aSp>GCa<br>MP6f | w <sup>-</sup> /+;<br>VT012791-<br>AD/+;<br>R47E02-                           | Gratings patterns of $\lambda=18^\circ$ and $\lambda=36^\circ$ moving at two different temporal frequency (1 Hz and 2 Hz) in two directions (front-to-back and back-to-front)                                                     | Supplementary Figure 2G   | 9  | 3 |

|                    |                                                                              |                                                                                                                                                  |                                                        |    |   |
|--------------------|------------------------------------------------------------------------------|--------------------------------------------------------------------------------------------------------------------------------------------------|--------------------------------------------------------|----|---|
|                    | DBD/20xUA<br>S-GCaMP6f                                                       |                                                                                                                                                  |                                                        |    |   |
| EmptySp>Kir<br>2.1 | w <sup>-</sup> /+; empty-<br>AD/+; empty-<br>DBD/10xUA<br>S-Kir2.1           | Motion-defined and dark bars<br>(18° width) moving at 90° s <sup>-1</sup><br>CW and CCW and starting from<br>behind the fly                      | Figure 2B,C<br>and<br>Supplement<br>ary Figure<br>3B,D | 44 | 3 |
| T3Sp>Kir2.1        | w <sup>-</sup> /+;<br>VT002055-<br>AD/+;<br>R65B04-<br>DBD/10xUA<br>S-Kir2.1 | Motion-defined and dark bars<br>(18° width) moving at 90° s <sup>-1</sup><br>CW and CCW and starting from<br>behind the fly                      | Figure 2B,C<br>and<br>Supplement<br>ary Figure<br>3B,D | 26 | 3 |
| T4/T5Sp>Kir<br>2.1 | w <sup>-</sup> /+;<br>R59E08-<br>AD/+;<br>R42F06-<br>DBD/10xUA<br>S-Kir2.1   | Motion-defined and dark bars<br>(18° width) moving at 90° s <sup>-1</sup><br>CW and CCW and starting from<br>behind the fly                      | Figure 2B,C<br>and<br>Supplement<br>ary Figure<br>3B,D | 22 | 3 |
| EmptySp>Kir<br>2.1 | w <sup>-</sup> /+; empty-<br>AD/+; empty-<br>DBD/10xUA<br>S-Kir2.1           | Motion-defined bar (18° width)<br>and wide-field panorama<br>moving at 112.5° s <sup>-1</sup> CW and<br>CCW (bar started at random<br>locations) | Figure 3B-F<br>and<br>Supplement<br>ary Figure 4       | 23 | 1 |
| T3Sp>Kir2.1        | w <sup>-</sup> /+;<br>VT002055-<br>AD/+;<br>R65B04-<br>DBD/10xUA<br>S-Kir2.1 | Motion-defined bar (18° width)<br>and wide-field panorama<br>moving at 112.5° s <sup>-1</sup> CW and<br>CCW (bar started at random<br>locations) | Figure 3B-F<br>and<br>Supplement<br>ary Figure 4       | 22 | 1 |
| T4/T5Sp>Kir<br>2.1 | w <sup>-</sup> /+;<br>R59E08-<br>AD/+;                                       | Motion-defined bar (18° width)<br>and wide-field panorama<br>moving at 112.5° s <sup>-1</sup> CW and                                             | Figure 3B-F<br>and                                     | 22 | 1 |

|                    |                                                                  |                                                                                                                                                                     |                        |    |   |
|--------------------|------------------------------------------------------------------|---------------------------------------------------------------------------------------------------------------------------------------------------------------------|------------------------|----|---|
|                    | R42F06-DBD/10xUA<br>S-Kir2.1                                     | CCW (bar started at random locations)                                                                                                                               | Supplementary Figure 4 |    |   |
| EmptySp>CsChrimson | w <sup>+/+</sup> ; empty-AD/+; empty-DBD/20xUA<br>S-Chrimson     | Motion-defined bar (18° width) and wide-field panorama moving at 112.5° s <sup>-1</sup> CW and CCW (bar started at random locations) during optogenetic stimulation | Figure 4C-F, 5A-D      | 20 | 1 |
| T3Sp>CsChrimson    | w <sup>+/+</sup> ; VT002055-AD/+; R65B04-DBD/20xUA<br>S-Chrimson | Motion-defined bar (18° width) and wide-field panorama moving at 112.5° s <sup>-1</sup> CW and CCW (bar started at random locations) during optogenetic stimulation | Figure 4C-F, 5A-D      | 22 | 1 |
| T4/T5Sp>CsChrimson | w <sup>+/+</sup> ; R59E08-AD/+; R42F06-DBD/20xUA<br>S-Chrimson   | Motion-defined bar (18° width) and wide-field panorama moving at 112.5° s <sup>-1</sup> CW and CCW (bar started at random locations) during optogenetic stimulation | Figure 4C-F, 5A-D      | 21 | 1 |

## 607 Acknowledgements

608 We thank Ivan Lopez for preliminary experimental results, Mehmet F. Keleş for reagents, and  
 609 Ben J. Hardcastle for technical advice. This work was supported by a grant from the National  
 610 Institutes of Health (R01-EY026031) to M.A.F.

## 611 Competing interests

612 The authors declare no competing interests.

## 613 Author contributions

614 G.F., and M.A.F. conceived the project. G.F. performed two-photon imaging, behavioral  
 615 experiments in rigidly and magnetically tethered flies, and analyzed the data. G.F. and M.A.F.  
 616 interpreted experiments and wrote the paper.

## 617 Videos

618 **Video 1.** Calcium imaging recording from T3 dendrites. T3 neurons expressing GCaMP6f respond  
619 to a back-to-front moving bright bar at  $90^\circ \text{ s}^{-1}$ .

620 **Video 2.** EmptySp>Kir2.1 fly presenting with a revolving motion-defined bar. Left: bottom view of a  
621 single fly within an animated cartoon of the surrounding display presenting a motion-defined bar  
622 revolving for 25 s at  $112.5^\circ \text{ s}^{-1}$ . Right-top: fly heading (white) and bar position (gray). Right-bottom:  
623 Error (red) between bar position and fly heading. EmptySp flies track the bar by using a saccade-and-  
624 fixation strategy. Original video recorded at 200 fps.

625 **Video 3.** T3Sp>Kir2.1 fly presenting with a revolving motion-defined bar. Conditions identical to  
626 Supplementary Video 2. T3Sp flies do not track the bar.

627 **Video 4.** T4/T5Sp>Kir2.1 fly presenting with a revolving motion-defined bar. Conditions identical  
628 to Supplementary Video 2. T4/T5Sp flies track the bar with some defects in gaze stabilization.

## 629 Data availability

630 Data will be posted in an online repository upon publication.

## 631 Code availability

632 Analysis and plotting code will be posted in an online repository upon publication.

## 633 References

- 634 Agrochao M, Tanaka R, Salazar-Gatzimas E, Clark DA. 2020. Mechanism for analogous illusory  
635 motion perception in flies and humans. *Proc Natl Acad Sci U S A* **117**:23044–23053.
- 636 Aptekar JW, Frye MA. 2013. Higher-order figure discrimination in fly and human vision. *Curr Biol*  
637 **23**:R694–700.
- 638 Aptekar JW, Keleş MF, Lu PM, Zolotova NM, Frye MA. 2015. Neurons forming optic glomeruli  
639 compute figure-ground discriminations in *Drosophila*. *J Neurosci* **35**:7587–7599.
- 640 Aptekar JW, Shoemaker PA, Frye MA. 2012. Figure tracking by flies is supported by parallel visual  
641 streams. *Curr Biol* **22**:482–487.
- 642 Bahl A, Ammer G, Schilling T, Borst A. 2013. Object tracking in motion-blind flies. *Nat Neurosci*  
643 **16**:730–738.
- 644 Bahl A, Serbe E, Meier M, Ammer G, Borst A. 2015. Neural Mechanisms for *Drosophila* Contrast



- 645 Vision. *Neuron* **88**:1240–1252.
- 646 Baines RA, Uhler JP, Thompson A, Sweeney ST, Bate M. 2001. Altered electrical properties in  
647 *Drosophila* neurons developing without synaptic transmission. *J Neurosci* **21**:1523–1531.
- 648 Bates DM. 1988. Nonlinear regression analysis and its applications. New York: Wiley.
- 649 Bates D, Mächler M, Bolker B, Walker S. 2015. Fitting Linear Mixed-Effects Models Using lme4.  
650 *J Stat Softw* **67**:1–48.
- 651 Bender JA, Dickinson MH. 2006. Visual stimulation of saccades in magnetically tethered  
652 *Drosophila*. *J Exp Biol* **209**:3170–3182.
- 653 Bengtsson H. 2018. R.matlab: Read and Write MAT Files and Call MATLAB from Within R.  
654 Comprehensive R Archive Network (CRAN).
- 655 Borst A. 2014. Fly visual course control: behaviour, algorithms and circuits. *Nat Rev Neurosci*  
656 **15**:590–599.
- 657 Borst A, Drews M, Meier M. 2020a. The neural network behind the eyes of a fly. *Current Opinion*  
658 *in Physiology* **16**:33–42.
- 659 Borst A, Haag J, Mauss AS. 2020b. How fly neurons compute the direction of visual motion. *J*  
660 *Comp Physiol A Neuroethol Sens Neural Behav Physiol* **206**:109–124.
- 661 Busch C, Borst A, Mauss AS. 2018. Bi-directional Control of Walking Behavior by Horizontal  
662 Optic Flow Sensors. *Curr Biol* **28**:4037–4045.e5.
- 663 Caldwell M. 2015. abf2: Load Gap-Free Axon ABF2 Files.
- 664 Cheong HS, Siwanowicz I, Card GM. 2020. Multi-regional circuits underlying visually guided  
665 decision-making in *Drosophila*. *Curr Opin Neurobiol* **65**:77–87.
- 666 Demerec M. 2008. Biology of *Drosophila*. Cold Spring Harbor, NY, USA: Cold Spring Harbor  
667 Laboratory Press.
- 668 Duistermars BJ, Frye M. 2008. A magnetic tether system to investigate visual and olfactory  
669 mediated flight control in *Drosophila*. *J Vis Exp*. doi:10.3791/1063
- 670 Egelhaaf M. 1985. On the neuronal basis of figure-ground discrimination by relative motion in the  
671 visual system of the fly. *Biol Cybern* **52**:195–209.
- 672 Fenk LM, Poehlmann A, Straw AD. 2014. Asymmetric processing of visual motion for  
673 simultaneous object and background responses. *Curr Biol* **24**:2913–2919.
- 674 Ferreira CH, Moita MA. 2020. Behavioral and neuronal underpinnings of safety in numbers in fruit  
675 flies. *Nat Commun* **11**:4182.
- 676 Fischbach K-F, Dittrich APM. 1989. The optic lobe of *Drosophila melanogaster*. I. A Golgi analysis  
677 of wild-type structure. *Cell Tissue Res* **258**:441–475.

- 678 Fisher YE, Silies M, Clandinin TR. 2015. Orientation Selectivity Sharpens Motion Detection in  
679 *Drosophila*. *Neuron* **88**:390–402.
- 680 Fry SN, Sayaman R, Dickinson MH. 2003. The aerodynamics of free-flight maneuvers in  
681 *Drosophila*. *Science* **300**:495–498.
- 682 Geurten BRH, Jähde P, Corthals K, Göpfert MC. 2014. Saccadic body turns in walking *Drosophila*.  
683 *Front Behav Neurosci* **8**:365.
- 684 Groschner LN, Malis JG, Zuidinga B, Borst A. 2022. A biophysical account of multiplication by a  
685 single neuron. *Nature*. doi:10.1038/s41586-022-04428-3
- 686 Gruntman E, Romani S, Reiser MB. 2019. The computation of directional selectivity in the  
687 *Drosophila* OFF motion pathway. *Elife* **8**. doi:10.7554/eLife.50706
- 688 Guizar-Sicairos M, Thurman ST, Fienup JR. 2008. Efficient subpixel image registration algorithms.  
689 *Opt Lett* **33**:156–158.
- 690 Haikala V, Joesch M, Borst A, Mauss AS. 2013. Optogenetic control of fly optomotor responses. *J*  
691 *Neurosci* **33**:13927–13934.
- 692 Heisenberg M, Wonneberger R, Wolf R. 1978. Optomotor-blindH31—a *Drosophila* mutant of the  
693 lobula plate giant neurons. *J Comp Physiol* **124**:287–296.
- 694 Joesch M, Schnell B, Raghu SV, Reiff DF, Borst A. 2010. ON and OFF pathways in *Drosophila*  
695 motion vision. *Nature* **468**:300–304.
- 696 Keleş MF, Frye MA. 2017a. The eyes have it. *Elife*. doi:10.7554/eLife.24896
- 697 Keleş MF, Frye MA. 2017b. Object-Detecting Neurons in *Drosophila*. *Curr Biol* **27**:680–687.
- 698 Keleş MF, Hardcastle BJ, Städele C, Xiao Q, Frye MA. 2020. Inhibitory Interactions and Columnar  
699 Inputs to an Object Motion Detector in *Drosophila*. *Cell Rep* **30**:2115–2124.e5.
- 700 Keleş MF, Mongeau J-M, Frye MA. 2018. Object features and T4/T5 motion detectors modulate  
701 the dynamics of bar tracking by *Drosophila*. *J Exp Biol*. doi:10.1242/jeb.190017
- 702 Klapoetke NC, Murata Y, Kim SS, Pulver SR, Birdsey-Benson A, Cho YK, Morimoto TK, Chuong  
703 AS, Carpenter EJ, Tian Z, Wang J, Xie Y, Yan Z, Zhang Y, Chow BY, Surek B, Melkonian M,  
704 Jayaraman V, Constantine-Paton M, Wong GK-S, Boyden ES. 2014. Independent optical  
705 excitation of distinct neural populations. *Nat Methods* **11**:338–346.
- 706 Klapoetke NC, Nern A, Rogers EM, Rubin GM, Reiser MB, Card GM. 2022. A functionally  
707 ordered visual feature map in the *Drosophila* brain. *Neuron* S0896–6273(22)00178–7.
- 708 Konstantinides N, Kapuralin K, Fadil C, Barboza L, Satija R, Desplan C. 2018. Phenotypic  
709 Convergence: Distinct Transcription Factors Regulate Common Terminal Features. *Cell*  
710 **174**:622–635.e13.

- 711 Land MF. 1992. Visual tracking and pursuit: Humans and arthropods compared. *J Insect Physiol*  
712 **38**:939–951.
- 713 Lenth RV. 2021. emmeans: Estimated Marginal Means, aka Least-Squares Means.
- 714 Liang P, Heitwerth J, Kern R, Kurtz R, Egelhaaf M. 2012. Object representation and distance  
715 encoding in three-dimensional environments by a neural circuit in the visual system of the  
716 blowfly. *J Neurophysiol* **107**:3446–3457.
- 717 Maisak MS, Haag J, Ammer G, Serbe E, Meier M, Leonhardt A, Schilling T, Bahl A, Rubin GM,  
718 Nern A, Dickson BJ, Reiff DF, Hopp E, Borst A. 2013. A directional tuning map of *Drosophila*  
719 elementary motion detectors. *Nature* **500**:212–216.
- 720 Mauss AS, Borst A. 2020. Optic flow-based course control in insects. *Curr Opin Neurobiol* **60**:21–  
721 27.
- 722 Mongeau J-M, Cheng KY, Aptekar J, Frye MA. 2019. Visuomotor strategies for object approach  
723 and aversion in *Drosophila melanogaster*. *J Exp Biol* **222**. doi:10.1242/jeb.193730
- 724 Mongeau J-M, Frye MA. 2017. *Drosophila* Spatiotemporally Integrates Visual Signals to Control  
725 Saccades. *Curr Biol* **27**:2901–2914.e2.
- 726 Panser K, Tirian L, Schulze F, Villalba S, Jefferis GSXE, Bühler K, Straw AD. 2016. Automatic  
727 Segmentation of *Drosophila* Neural Compartments Using GAL4 Expression Data Reveals  
728 Novel Visual Pathways. *Curr Biol* **26**:1943–1954.
- 729 Reichardt W, Poggio T. 1976. Visual control of orientation behaviour in the fly. Part I. A  
730 quantitative analysis. *Q Rev Biophys* **9**:311–75, 428–38.
- 731 Reichardt W, Poggio T, Hausen K. 1983. Figure-ground discrimination by relative movement in the  
732 visual system of the fly. *Biol Cybern* **46**:1–30.
- 733 Reiser MB, Dickinson MH. 2010. *Drosophila* fly straight by fixating objects in the face of  
734 expanding optic flow. *J Exp Biol* **213**:1771–1781.
- 735 Reiser MB, Dickinson MH. 2008. A modular display system for insect behavioral neuroscience. *J*  
736 *Neurosci Methods* **167**:127–139.
- 737 RStudio Team. 2021. RStudio: Integrated Development Environment for R. Boston, MA: RStudio,  
738 PBC.
- 739 Shinomiya K, Huang G, Lu Z, Parag T, Xu CS, Aniceto R, Ansari N, Cheatham N, Lauchie S,  
740 Neace E, Ogundeyi O, Ordish C, Peel D, Shinomiya A, Smith C, Takemura S, Talebi I, Rivlin  
741 PK, Nern A, Scheffer LK, Plaza SM, Meinertzhagen IA. 2019. Comparisons between the ON-  
742 and OFF-edge motion pathways in the *Drosophila* brain. *Elife* **8**. doi:10.7554/eLife.40025
- 743 Shinomiya K, Nern A, Meinertzhagen IA, Plaza SM, Reiser MB. 2022. Neuronal circuits

- 744 integrating visual motion information in *Drosophila melanogaster*. *Current Biology*.  
745 doi:10.1016/j.cub.2022.06.061
- 746 Städele C, Keleş MF, Mongeau J-M, Frye MA. 2020. Non-canonical Receptive Field Properties and  
747 Neuromodulation of Feature-Detecting Neurons in Flies. *Curr Biol*.  
748 doi:10.1016/j.cub.2020.04.069
- 749 Strother JA, Wu S-T, Wong AM, Nern A, Rogers EM, Le JQ, Rubin GM, Reiser MB. 2017. The  
750 Emergence of Directional Selectivity in the Visual Motion Pathway of *Drosophila*. *Neuron*  
751 **94**:168–182.e10.
- 752 Takemura S-Y, Bharioke A, Lu Z, Nern A, Vitaladevuni S, Rivlin PK, Katz WT, Olbris DJ, Plaza  
753 SM, Winston P, Zhao T, Horne JA, Fetter RD, Takemura S, Blazek K, Chang L-A, Ogundeyi  
754 O, Saunders MA, Shapiro V, Sigmund C, Rubin GM, Scheffer LK, Meinertzhagen IA,  
755 Chklovskii DB. 2013. A visual motion detection circuit suggested by *Drosophila*  
756 connectomics. *Nature* **500**:175–181.
- 757 Takemura S-Y, Xu CS, Lu Z, Rivlin PK, Parag T, Olbris DJ, Plaza S, Zhao T, Katz WT, Umayam  
758 L, Weaver C, Hess HF, Horne JA, Nunez-Iglesias J, Aniceto R, Chang L-A, Lauchie S, Nasca  
759 A, Ogundeyi O, Sigmund C, Takemura S, Tran J, Langille C, Le Lacheur K, McLin S,  
760 Shinomiya A, Chklovskii DB, Meinertzhagen IA, Scheffer LK. 2015. Synaptic circuits and  
761 their variations within different columns in the visual system of *Drosophila*. *Proc Natl Acad Sci*  
762 *U S A* **112**:13711–13716.
- 763 Tammero LF, Dickinson MH. 2002. The influence of visual landscape on the free flight behavior of  
764 the fruit fly *Drosophila melanogaster*. *J Exp Biol* **205**:327–343.
- 765 Tammero LF, Frye MA, Dickinson MH. 2004. Spatial organization of visuomotor reflexes in  
766 *Drosophila*. *J Exp Biol* **207**:113–122.
- 767 Tanaka R, Clark DA. 2022. Neural mechanisms to exploit positional geometry for collision  
768 avoidance. *Curr Biol* **32**:2357–2374.e6.
- 769 Tanaka R, Clark DA. 2020. Object-Displacement-Sensitive Visual Neurons Drive Freezing in  
770 *Drosophila*. *Curr Biol*. doi:10.1016/j.cub.2020.04.068
- 771 Theobald JC, Duistermars BJ, Ringach DL, Frye MA. 2008. Flies see second-order motion. *Curr*  
772 *Biol* **18**:R464–5.
- 773 van Breugel F, Dickinson MH. 2012. The visual control of landing and obstacle avoidance in the  
774 fruit fly *Drosophila melanogaster*. *J Exp Biol* **215**:1783–1798.
- 775 von Reyn CR, Nern A, Williamson WR, Breads P, Wu M, Namiki S, Card GM. 2017. Feature  
776 Integration Drives Probabilistic Behavior in the *Drosophila* Escape Response. *Neuron*

- 777           **94**:1190–1204.e6.
- 778 Weir PT, Dickinson MH. 2015. Functional divisions for visual processing in the central brain of  
779           flying *Drosophila*. *Proc Natl Acad Sci U S A* **112**:E5523–5532.
- 780 Wickham H. 2016. *ggplot2: Elegant Graphics for Data Analysis*. Springer-Verlag New York.
- 781 Wu M, Nern A, Williamson WR, Morimoto MM, Reiser MB, Card GM, Rubin GM. 2016. Visual  
782           projection neurons in the *Drosophila* lobula link feature detection to distinct behavioral  
783           programs. *Elife* **5**. doi:10.7554/eLife.21022
- 784 Yang HH, Clandinin TR. 2018. Elementary Motion Detection in *Drosophila*: Algorithms and  
785           Mechanisms. *Annu Rev Vis Sci* **4**:143–163.

### Supplementary Figure 1

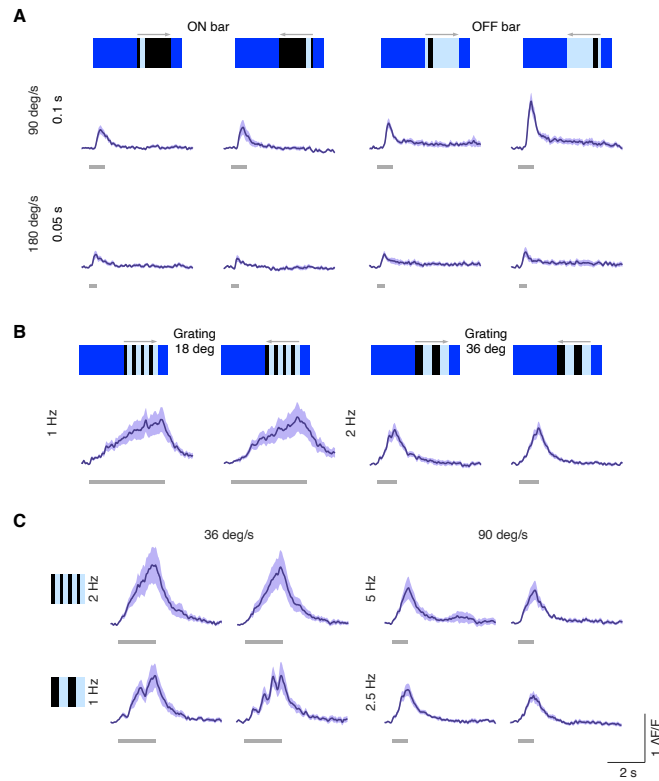

**Supplementary Figure 1.** Speed tuning of T3 neurons. **(A)** Average responses (mean  $\pm$  s.e.m.) of T3 neurons to ON and OFF solid moving bars (9° x 72°, width x height) moving in two different directions (front-to-back and back-to-front) at two different speeds. Visual stimuli are depicted at the top. Light gray horizontal bars at the bottom indicate stimulus presentation (n = 11 flies, 3 repetitions per fly). **(B)** T3 responses to moving gratings of different spatial and temporal frequencies. **(C)** Left: T3 neurons show similar peaks for gratings moving at 36° s<sup>-1</sup> regardless of the spatial frequency of the stimuli. Right: same effect for gratings moving at 90° s<sup>-1</sup>. The slow calcium integration dynamic combined with the full rectification represents an optimal mechanism for speed detection.



## Supplementary Figure 2

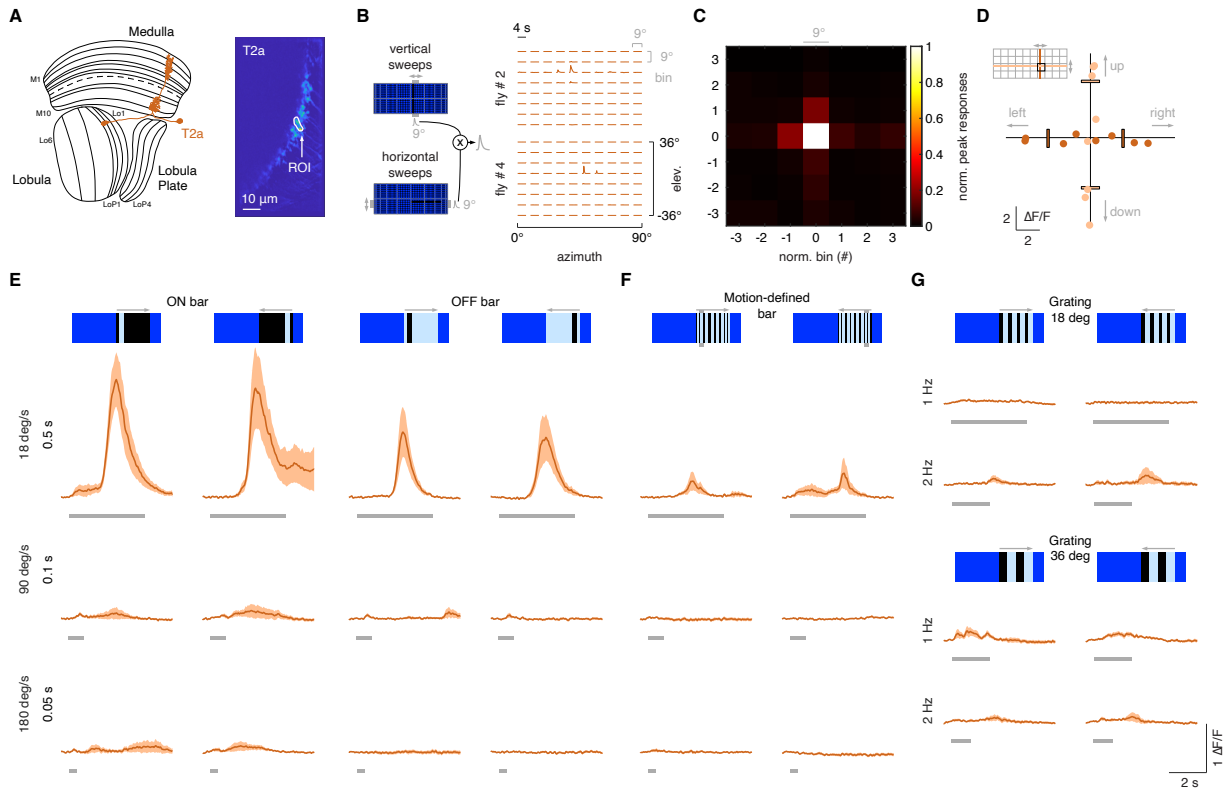

**Supplementary Figure 2.** T2a neurons do not show a broad temporal sensitivity. **(A)** Left: schematic representation of a T2a neuron (orange) within the optic lobe. Right: ROI drawn around the presynaptic terminal in the lobula of a T2a neuron expressing GCaMP6f. Image representing the mean activity from the two-photon imaging experiment in a representative fly. **(B)** Left: representation of the procedure used to probe the RF of T2a (as done in **Figure 1F**). Right: matrix of the responses obtained by multiplying horizontal and vertical sweeps in two representative flies. **(C)** Mean of the normalized peak responses of T2a neurons by spatial location ( $n = 4$  flies). Bin = 0 represents the center of the RF. **(D)** Directional calcium peak responses to a  $2.25^\circ$  dark bar moving ( $18^\circ \text{ s}^{-1}$ ) in the four cardinal directions of individual flies. **(E)** Average responses (mean  $\pm$  s.e.m.) to moving ON and OFF solid bars ( $9^\circ \times 72^\circ$ , width  $\times$  height) at different speeds in two different directions (front-to-back and back-to-front). Visual stimuli are depicted at the top. Light gray horizontal bars at the bottom indicate stimulus presentation ( $n = 9$  flies, 3 repetitions per fly). **(F)** Average responses (mean  $\pm$  s.e.m.) to motion-defined bars moving in two different directions (front-to-back and back-to-front) at different speeds. **(G)** Top: T2a responses to a grating of  $\lambda=18^\circ$  moving front-to-back and back-to-front at two different temporal frequencies. Bottom: T2a responses to a grating of  $\lambda=36^\circ$ .

### Supplementary Figure 3

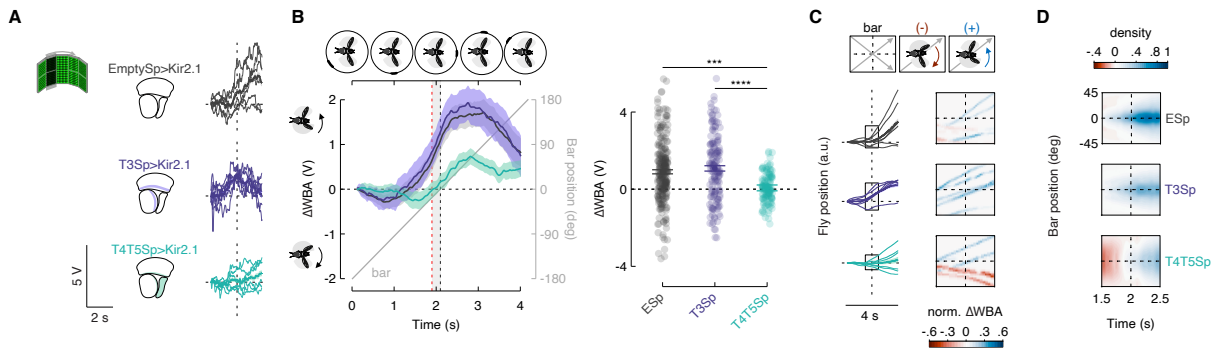

**Supplementary Figure 3.** Hyperpolarization of T3 does not compromise the syn-directional response. **(A)** Left: representation of the visual stimulus (dark bar revolving at  $90^\circ \text{ s}^{-1}$ ). Middle: schematic representation of the optic lobe regions where Kir2.1 channels were expressed in the three genotypes tested. Right: single trials (3 repetitions x 2 directions) of  $\Delta\text{WBA}$  responses (thin lines) to rotation of a luminance-defined bar in three representative flies (T4/T5Sp>Kir2.1 data are reproduced from Keleş et al., 2018). Thick line represents the mean (responses to CCW rotations were reflected and pooled with CW responses). Vertical dashed lines indicate when the bar is at the fly's visual midline while the horizontal ones represent  $\Delta\text{WBA} = 0$ . **(B)** Left: population average time series steering responses (mean  $\pm$  s.e.m.) in the three genotypes tested (T4/T5Sp data replotted from Keleş et al., 2018) to a luminance-defined bar. Gray shaded region (between vertical red and black dashed lines) represents a 200 ms time window before the bar crosses the fly's visual midline ( $n = 44$  EmptySp>Kir2.1,  $n = 26$  T3Sp>Kir2.1,  $n = 22$  T4/T5Sp>Kir2.1). T4/T5Sp>Kir2.1 reduces syn-directional anticipatory steering, whereas T3Sp>Kir2.1 shows normal syn-directional steering. Right: Dot plot average  $\Delta\text{WBA}$  values across the 200 ms time window per trial. Dark dots indicate the mean and the horizontal bars indicate s.e.m. ( $F_{(2, 89)} = 14.48$ ,  $p < .0001$ ; EmptySp vs T3Sp:  $p = .94$ ; EmptySp vs T4/T5Sp:  $p < .0001$ ; T3Sp vs T4/T5Sp:  $p < .0001$ ). **(C)** Left: arbitrary fly position (thin lines) resulting from the integration of  $\Delta\text{WBA}$  values over time in three representative flies. Thick lines represent the mean. Right: space-time plot of the normalized fly position within the gray shaded boxes highlighted to the left. Color-code represents the direction of the steering effort (red: counter-directional; blue: syn-directional). **(D)** Heat maps of flies' steering effort at the population level in the three genotypes as a function of the bar position. EmptySp and T3Sp flies show a strong syn-directional response (blue blob) while T4/T5Sp flies show an early counter-directional response and a weak syn-directional response.

### Supplementary Figure 4

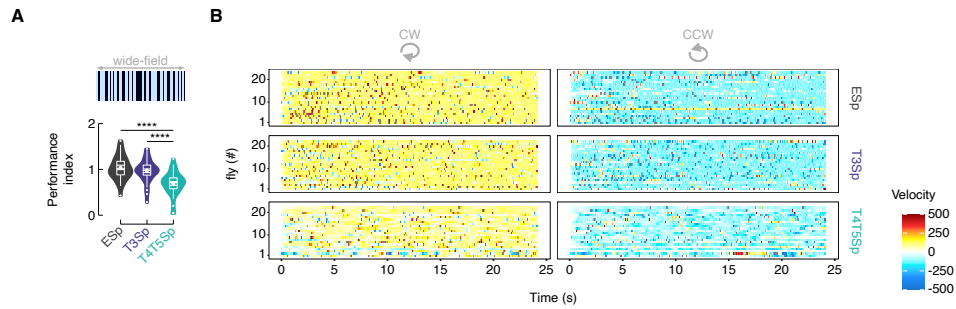

**Supplementary Figure 4.** T3 silencing does not affect the response to the rotation of a wide-field panorama. **(A)** Violin-box plot of the performance index (i.e., gain) to a rotating random wide-field pattern of dark and bright stripes in the three genotypes. T4/T5Sp shows a strong reduction of the smooth tracking gain while T3Sp shows a normal tracking response (pairwise post-hoc comparisons adjusted Bonferroni, EmptySp vs T3Sp:  $p = 1$ ; EmptySp vs T4/T5Sp:  $p < .0001$ ; T3Sp vs T4/T5Sp:  $p < .0001$ ). **(B)** Raster plot of the velocity (yellow-red: CW; green-blue: CCW) per fly during the rotation of the wide-field panorama (each bin represents 100 ms of average velocity). Note that T4/T5Sp>Kir2.1 flies reduce the tracking velocity, whereas T3Sp>Kir2.1 flies show a velocity comparable to control flies ( $n = 20$  EmptySp>Kir2.1,  $n = 22$  T3Sp>Kir2.1,  $n = 21$  T4/T5>Kir2.1).

### Supplementary Figure 5

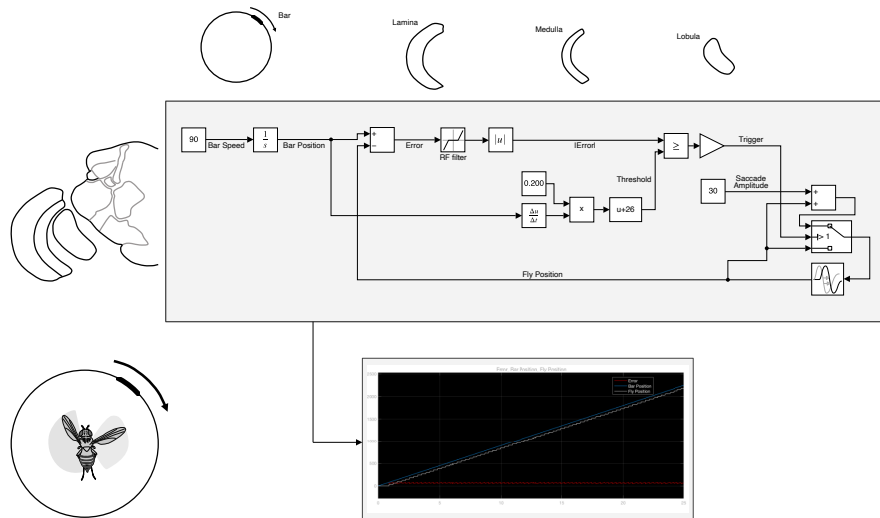

**Supplementary Figure 5.** Control model for triggering saccades. Top: simulink (MATLAB) implementation of the physiologically-inspired model in **Figure 6**. The bar speed ( $90^\circ \text{ s}^{-1}$ ) is integrated over a quite narrow time window ( $\sim 200$  ms). This means that T3 neurons might encode the bar speed and a downstream partner might integrate this information over a selective amount of time, encoding the bar position and triggering a saccade when the amount of calcium reaches a specific threshold. In this model saccade amplitudes are considered a fixed parameter ( $30^\circ$ ) but in an alternative version they could be easily tuned to the bar speed (as a role played by the T4/T5 pathway). Bottom: simulation of the fly behavior (angular position) in a bar tracking task according to the control model.
